# Supplementary material
Source: PubMed Central journal article supplement (PMC9903729)
Supplement: mmc1.pdf [file mmc1.pdf]

**Supplemental information**

**A patient-driven clinicogenomic partnership  
for metastatic prostate cancer**

**Jett Crowdis, Sara Balch, Lauren Sterlin, Beena S. Thomas, Sabrina Y. Camp, Michael Dunphy, Elana Anastasio, Shahrzad Shah, Alyssa L. Damon, Rafael Ramos, Delia M. Sosa, Ilan K. Small, Brett N. Tomson, Colleen M. Nguyen, Mary McGillicuddy, Parker S. Chastain, Meng Xiao He, Alexander T.M. Cheung, Stephanie Wankowicz, Alok K. Tewari, Dewey Kim, Saud H. AlDubayan, Ayanah Dowdye, Benjamin Zola, Joel Nowak, Jan Manarite, Idola Henry Gunn, Bryce Olson, Eric S. Lander, Corrie A. Painter, Nikhil Wagle, and Eliezer M. Van Allen**

## Outreach

**a**

Study staff have attended Prostate Cancer patient conferences across the United States to share about the project.

**b**

|                                |                                                                                                                                                                                         |
|--------------------------------|-----------------------------------------------------------------------------------------------------------------------------------------------------------------------------------------|
| Social Media                   | "Meet the Team" MPCproject staff features, MPCproject enrollment updates, advocacy partner site visits, advocacy partner highlights                                                     |
| Conferences                    | <u>Patient conferences:</u> MPCC, PCal, Quest for a Cure, "My Brother's Keeper" Men's Cancer Network, Prostate Cancer Today                                                             |
| Advocacy Partnerships          | Fans for the Cure interview, ADK Hike for Hope canoe trek, Prostate Cancer Foundation Chocolate Challenge                                                                               |
| Traditional outreach           | CureTalks podcast, quarterly email updates, GU Onc UroToday podcast, Wall Street Journal feature, Channel 5 patient interview, Nature Medicine feature, Prostate Cancer Today interview |
| Project Advisory Council (PAC) | PAC working groups on how to accurately message the project to patients, caregivers, and loved ones through community outreach or via our website                                       |

## Education

In response to survey feedback from patients, study staff created an infographic explaining why the MPCproject collects blood biopsies.

|              |                                                                                                                                                                                                      |
|--------------|------------------------------------------------------------------------------------------------------------------------------------------------------------------------------------------------------|
| Social Media | Project infographics and videos (tissue requesting, acquisition of saliva samples, sequencing process, etc), statistics on racial disparities in prostate cancer diagnoses, data walkthrough videos. |
| Conferences  | <u>Scientific conferences:</u> GU ASCO                                                                                                                                                               |

**c**

- Prostate Cancer Foundation
- Prostate Cancer International, Inc.
- Adirondak Hike for Hope
- Cancer ABC's
- Us TOO
- Answer Cancer Foundation
- Malecare
- Prostate Network
- Patient Power
- Blue Cure Foundation
- Fans for the Cure
- Facing Our Risk of Cancer Empowered
- The Men's Cancer Network, Inc.
- Veterans Prostate Cancer Awareness
- Hampton Roads Prostate Health Forum

1

2 **Supplementary Figure S1. MPCproject education and outreach initiatives reach patient-**  
 3 **partners across the country, related to Fig. 1A.**

4 **a)** Education and outreach spotlights. Study staff attend and present at patient conferences to  
 5 share information about the MPCproject with the extended prostate cancer community.

6 Conference tables have example sample kits, brochures, and a mailing list sign-up to learn more.

7 For patients who follow the MPCproject on social media, study staff create online polls to

8 identify educational content important to the community. One such poll revealed interest in  
9 learning about the biological significance of liquid biopsies and why the project collects them. **b)**  
10 Select examples of outreach and education initiatives. As a result of the decentralized, online  
11 nature of the study, the MPCproject uses diverse modes of education and outreach to reach  
12 patient-partners. **c)** The MPCproject partners with patient advocacy groups across the United  
13 States and Canada. Advocacy partners help encourage patient participation in the project as well  
14 provide ongoing input regarding the design and implementation of the project overall.

**a**

Please fill out as much as you can. All questions are optional. You can return at any time with the link sent to you by email.

1. **When were you first diagnosed with prostate cancer? If you do not remember the month, you can enter just the year.**

Choose month... Choose year...

2. **When you were first diagnosed, were you diagnosed with advanced or metastatic prostate cancer (prostate cancer that has spread beyond the prostate, including biochemical recurrence)?**

- Yes
- No
- I don't know

3. **Did you receive local treatment to your prostate when you were first diagnosed (local treatment includes surgery, radiation, or cryotherapy)?**

- Yes
- No
- I don't know

4. **Have you had your entire prostate surgically removed (known as a prostatectomy)?**

- Yes
- No
- I don't know

5. **Where is your prostate cancer currently located (check all that apply)?**

- Lymph Node
- Bone
- Liver
- Lung
- Brain
- Other

Please provide details

- No Evidence of Disease (NED)
- I don't know

6. **For your advanced prostate cancer (prostate cancer that is outside of the prostate), please check off all therapies that you have previously received or are currently receiving (Check all that apply)**

Hormones

...

Chemotherapy

...

Other Therapy

...

Experimental/Clinical Trial

- Experiment/Clinical Trial

Please provide details

- Other

Please provide details

7. **Please list additional medications, alternative medications, you've taken or lifestyle changes that you've made since your diagnosis with prostate cancer.**

8. **Have you had any other types of cancer?**

- Yes
- No
- I don't know

9. **What other cancer(s) have you had?**

10. **Do you have any family history of prostate and/or breast cancer?**

- Yes
- No
- I don't know

11. **How did you find out about this project?**

12. **Is there anything else you would like us to know about your prostate cancer?**

13. **Do you consider yourself Hispanic, Latino or Spanish?**

- Yes
- No
- I don't know

14. **What is your race (select all that apply)?**

- American Indian or Native American
- Japanese
- Chinese
- Other East Asian
- South East Asian or Indian
- Black or African American
- Native Hawaiian or other Pacific Islander
- White
- I prefer not to answer
- Other

Please provide details

15. **In what year were you born?**

Choose year...

16. **What country do you live in?**

Choose country...

17. **What is your ZIP or postal code?**

Zip Code

I understand that the information I entered here will be stored in a secure database and may be used to match me to one or more research studies conducted by the Metastatic Prostate Cancer Project. If the information that I entered matches a study being conducted by the Metastatic Prostate Cancer Project, either now or in the future, I agree to be contacted about possibly participating. I understand that if I would like my information deleted from the database, now or in the future, I can email [info@mpcproject.org](mailto:info@mpcproject.org) and my information will be removed from the database.

SUBMIT

16 **Supplementary Figure S2. MPCproject About You Intake Survey, related to STAR**

17 **Methods.**

18 **a)** After registering, patient-partners complete an online intake survey detailing their experience  
19 with metastatic prostate cancer (<https://mpcproject.org/AboutYouSurvey.pdf>). All questions are  
20 optional. Questions were developed in collaboration with patient-partners and practicing prostate  
21 cancer oncologists. For a full list of therapies for question 6, see Supplementary Table S4. The  
22 survey responses above are shown as an example and do not represent any specific patient-  
23 partner's responses.

a

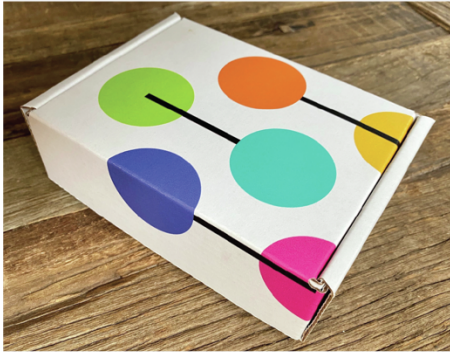

b

**count me in**

**Saliva collection instructions**

Do NOT eat, drink, smoke or chew gum for 30 minutes before giving your saliva sample. Do NOT remove the plastic film from the funnel lid.

1. Spit until the amount of saliva\* (not bubbles) reaches the fill line.
2. Close lid tightly by pushing down hard on the funnel lid until you hear a loud click.
3. Hold the tube upright. Unscrew the funnel from the tube.
4. Use the small cap to close the tube tightly.
5. Shake the capped tube for 5 seconds. Discard funnel.

⚠ Small cap, choking hazard. Wash with water if stabilizing liquid comes in contact with eyes or skin. Do NOT ingest.

---

**Mailing instructions**

6. Locate specimen bag provided. Do NOT remove absorbent pad.
7. Seal the capped tube into the bag.
8. Place bag with sample back into original box.
9. Close box and seal shut.
10. Mail from nearest postal location.

---

**Need help?**  
 Phone: 851-293-5029  
 Email: [info@mpcproject.org](mailto:info@mpcproject.org)

**Metastatic Prostate Cancer Project**

[www.mpcproject.org](http://www.mpcproject.org)

FD-PH-00648 Issue 2/2017-00

24

25 **Supplementary Figure S3. MPCproject remote saliva donation kit, related to STAR**

26 **Methods.**

27 **a)** Enrolled patients in the U.S. and Canada are mailed a saliva kit. Each kit comes with a tube  
 28 for saliva donation and a prepaid FedEx return envelope. All components of the kit, including the  
 29 box itself, contain a unique, nonidentifiable barcode associated with the patient-partner. Acting  
 30 on feedback about privacy from patient-partners and advocates, boxes are kept nondescript to  
 31 avoid identifying the recipient as a patient with prostate cancer.

- 32    **b)** Saliva kit instructions. These instructions are included in the box itself, and patient-partners  
33    can contact the MPCproject study team for additional assistance if necessary.

a

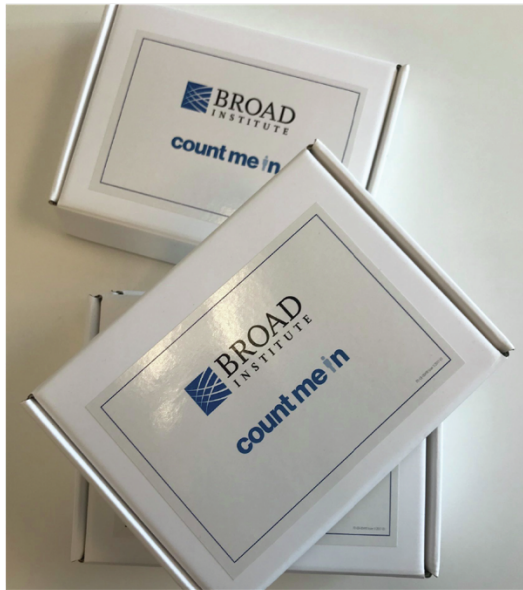

b

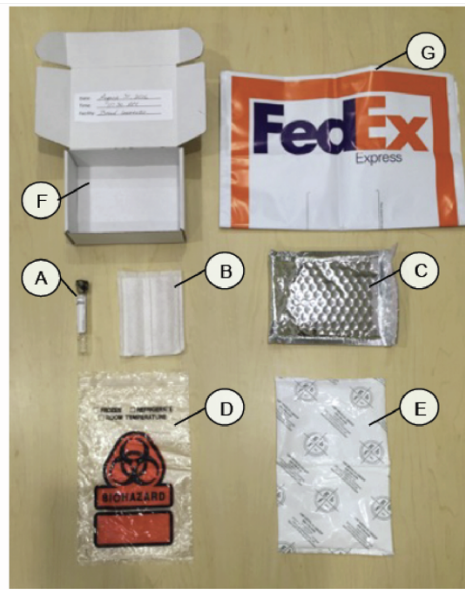

- A: Blood collection tube
- B: Absorbent sleeve
- C: Silver insulated bag
- D: Biohazard bag
- E: Room temperature gel pack
- F: Return box
- G: FedEx clinical pack

**c Instructions for Phlebotomist**

Dear Medical Provider,

Your patient is participating in the Metastatic Prostate Cancer Project, a research collaboration between the Broad Institute of MIT and Harvard and Dana-Farber Cancer Institute. The goal of the study is to create a patient-researcher partnership to speed important discoveries for prostate cancer.

Your patient has enrolled in this study and signed a consent form that allows us to obtain a sample of their blood. We are asking for your help with this courtesy draw for 1 tube of blood, included in this kit. The tube contains a preservative that stabilizes the sample. **Please draw this tube last, after all clinical draws are complete.** Everything is barcode labeled so that no identifying information needs to be included. Please see the instructions to the right on how to package the blood.

You can find out more about the project at [mpcproject.org](http://mpcproject.org). Thank you for your assistance with this research study.

Sincerely,

Eliezer Van Allen, MD

Please contact the study team at [info@mpcproject.org](mailto:info@mpcproject.org) or 651-293-5029 if you have any questions.

**1** Please perform a blood draw using the provided Blood Collection Tube (A).

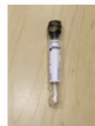

**2** Secure the Tube (A) in either of the slots of the Absorbent Sleeve (B). Place the sleeve into the Silver Insulated Bag (C) and seal it. Place this into the Biohazard Bag (D).

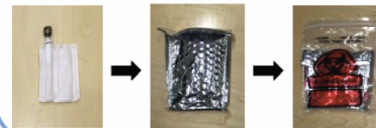

**3** Wrap the Room Temperature Gel Pack (E) around the outside of the Biohazard Bag (D).

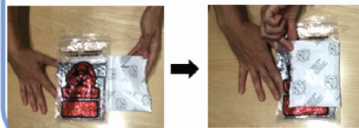

**4** Place the wrapped Biohazard Bag (D) into the Return Shipper Box (F).

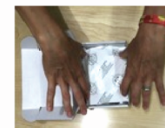

**5** Write time, date, and name of facility where the blood was drawn on the label inside of the lid of the Return Shipper Box (F).

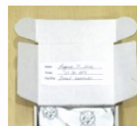

**6** Place the Return Shipper Box (F) into the FedEx Clinical Pak (G), check off "Exempt Human Specimen" on the Clinical Pak (G), and hand back to the patient.

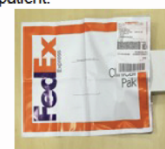

34

35 Supplementary Figure S4. MPCproject blood donation kit, related to STAR Methods.



36 **a)** If they consented to donate blood on their online survey, patient-partners are mailed a blood  
37 kit. Each kit comes with a tube for blood donation, instructions for use, and a unique,  
38 nonidentifiable barcode. Acting on feedback about privacy from patient-partners and advocates,  
39 boxes are kept nondescript to avoid identifying the recipient as a patient with prostate cancer.

40 **b)** Composition of blood donation kit. This graphic is included within the blood donation kit.

41 **c)** Instruction for healthcare providers. Patient-partners provide these instructions to their  
42 healthcare provider or phlebotomist at regular, standard of care blood draws. A courtesy draw is  
43 requested, free of charge, but if this is not available, patient-partners can also visit a local Quest  
44 Diagnostics lab with a free voucher for a blood draw. After completion, the kit is placed within  
45 the prepaid FedEx envelope and mailed to the Broad Institute where it is kept for sequencing.

a

Patient-partner Concern/Feedback

I would like to donate tissue, but I am starting a trial that may need it in the future.  
*Email*

I cannot get the online form to work.  
*Email, Phone*

How do I get my blood drawn? My doctor would not give a courtesy draw. What is my blood used for?  
*Email*

I recently had a large change in my treatment regimen. Can you update my medical records?  
*Email*

I want to participate, but I don't want those close to me to know I have prostate cancer.  
*Email*

MPCproject Team Response

Worked directly with hospital pathologist to ensure tissue remained, kept regular communication with patient throughout request process.

Talked with patient on phone, sent paper versions of forms with prepaid envelopes to patient's home.

Patient was walked through process of free Quest Diagnostic blood draw. Graphics created to explain how donated blood is used.

Medical records rerequested from patient's current hospital.

Working with patients and advocates, blood and saliva kits redesigned to be nondescript for privacy.

b

**Genomic Profile Sample Counts**

| Molecular Profile                    | #  | Freq  |
|--------------------------------------|----|-------|
| Putative copy-number alterations ... | 30 | 40.0% |
| Mutations                            | 30 | 40.0% |

**Mutation Count vs Fraction of Genome Altered**

**Search...**

| Y Gene   | Cytoband | CNA | #  | Freq  | Treatment    | #  |
|----------|----------|-----|----|-------|--------------|----|
| HST1H1E  | 6p22.2   | AMP | 16 | 53.3% | LEUPROLIDE   | 40 |
| HST1H2AE | 6p22.2   | AMP | 16 | 53.3% | BICALUTAMIDE | 29 |
| HST1H2AD | 6p22.2   | AMP | 16 | 53.3% | DOCETAXEL    | 15 |
| HST1H2BD | 6p22.2   | AMP | 16 | 53.3% | DEGARELIX    | 12 |
| HST1H2AC | 6p22.2   | AMP | 16 | 53.3% | ABIRATERONE  | 9  |
| HST1H2BG | 6p22.2   | AMP | 16 | 53.3% | DENOSUMAB    | 7  |
| HST1H2BF | 6p22.2   | AMP | 16 | 53.3% | ENZALUTAMIDE | 6  |
| HST1H2BE | 6p22.2   | AMP | 16 | 53.3% | TRIPTORELIN  | 5  |
| HST1H2BC | 6p22.2   | AMP | 16 | 53.3% | DUTASTERIDE  | 5  |
| HST1H3D  | 6p22.2   | AMP | 16 | 53.3% | SIPULEUCEL-T | 4  |

**Metastatic Prostate Cancer Project** · Follow  
May 21, 2019 at 9:50 AM - 8

May 2019 - Dr. Eli Van Allen and Sara Balch walk through the MPCproject.org data publicly available online.

c

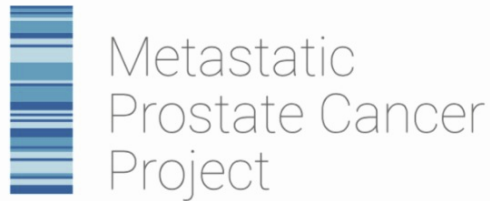

Dear MPCproject Mailing List,

We are writing to share another quarterly update with the patients, caregivers, scientists, and advocacy partners engaged in the Metastatic Prostate Cancer Project (MPCproject.org). We are tremendously grateful for your continued support. Below you will find some recent news from the MPCproject.

**The Numbers**

Over 745 patients have clicked "Count Me In" to register for the project. Thanks to your generosity, we have received:

- 662 medical records
- 417 saliva kits
- 329 blood samples

**Understanding Our Data**

The MPCproject recently released a video of Dr. Eli Van Allen walking through the genomic and clinical data we have released thus far on cBioPortal. We will continue to release data as it is generated, pre-publication. If you have any questions regarding the data currently available, please email us at [data@mpcproject.org](mailto:data@mpcproject.org).

46 **Supplementary Figure S5. Working directly with patients in the MPCproject, related to**  
47 **Fig. 1A.**

48 **a)** Examples of feedback from patient-partners and the response of the project team. In each  
49 case, patient-partners contacted the MPCproject office with concerns, questions, or feedback.  
50 The MPCproject study staff maintains regular contact with patient-partners that have questions  
51 and creates infographics and educational materials based on common questions.

52 **b)** Walkthrough of initial MPCproject data on cBioPortal. When the project's first data release  
53 happened on cBioPortal, Dr. Van Allen and the study team recorded a walkthrough  
54 (<https://m.facebook.com/watch/?v=471939353546532>) explaining the shared MPCproject data to  
55 patient-partners.

56 **c)** Quarterly email updates. An example of a quarterly update sent four times a year to patient-  
57 partners, loved ones, and advocates on the MPCproject mailing list. These emails explain study  
58 progress, how to interpret data releases, and new project initiatives.

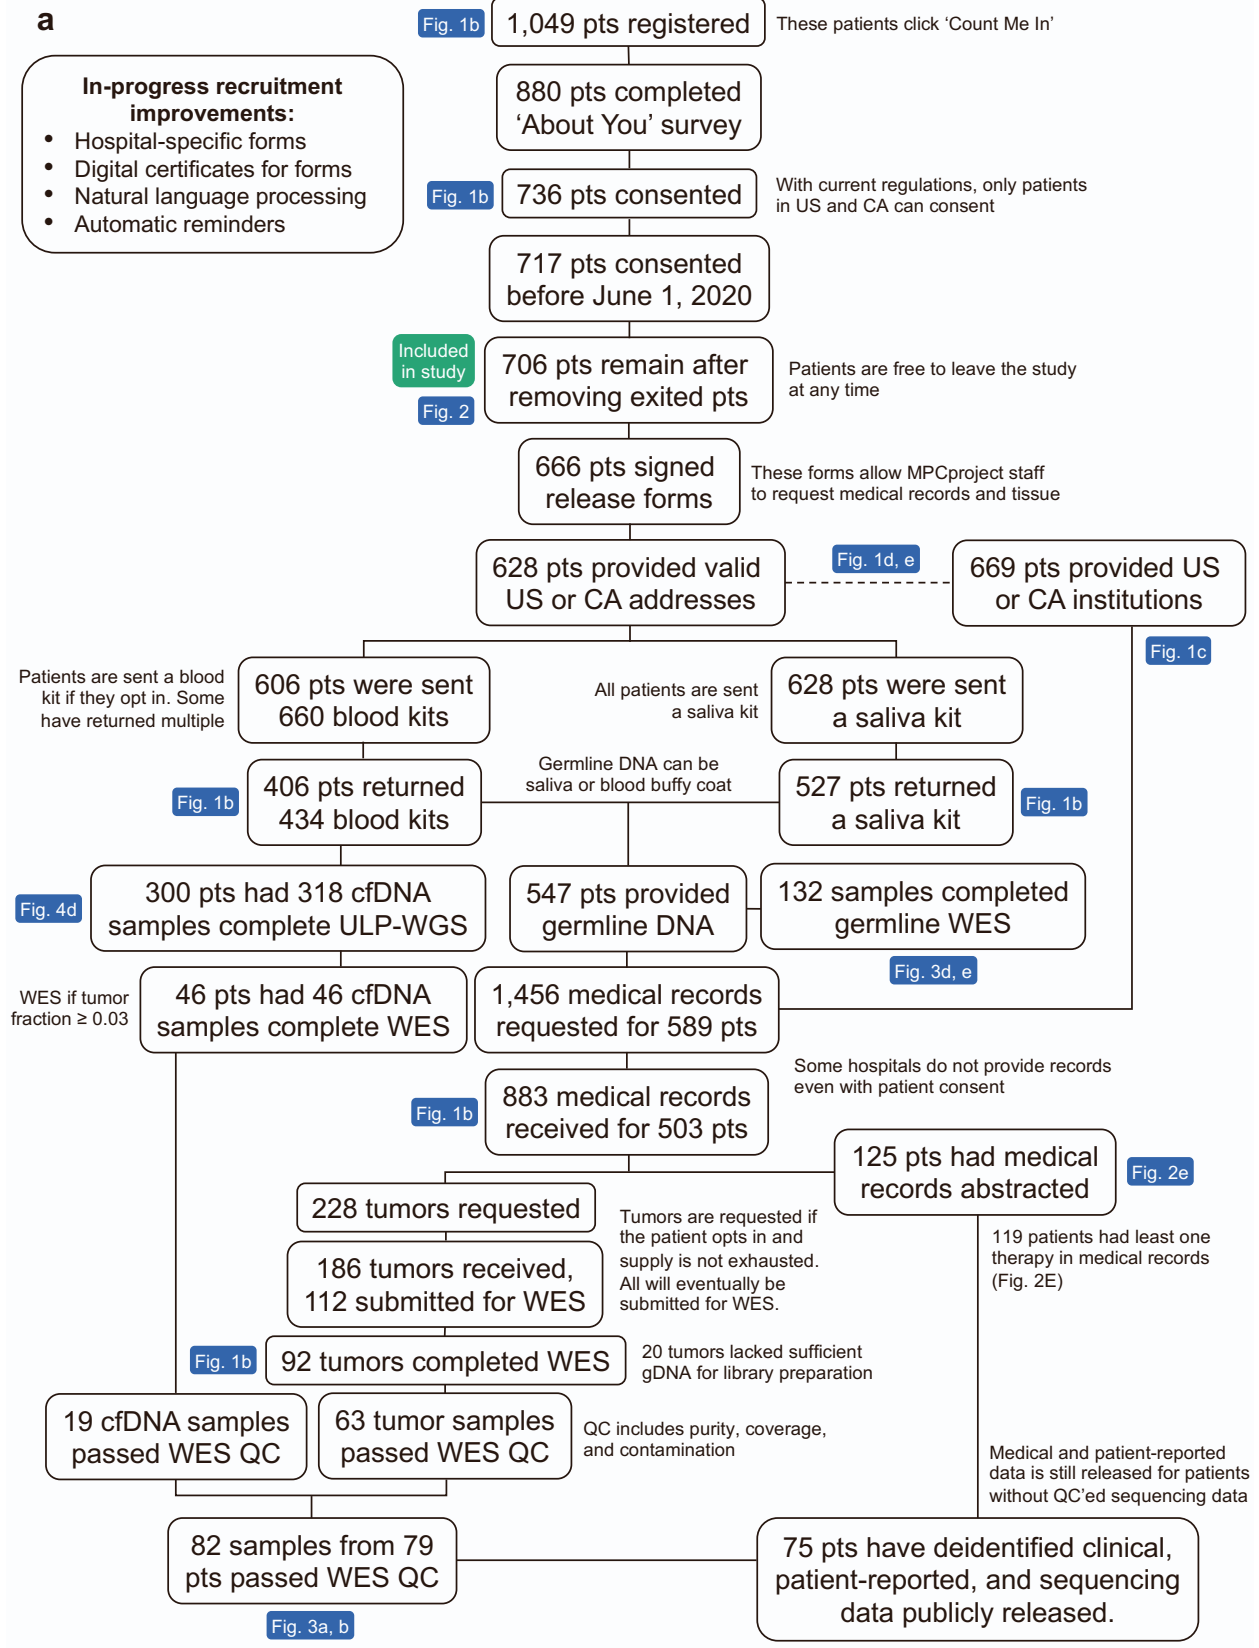

60 **Supplementary Figure S6. MPCproject attrition chart, related to Fig. 1B.**

61 **a)** Chart detailing project attrition for patient-partners that consented as of June 1, 2020. The  
62 chart represents data collected on June 7, 2021. Patient recruitment, sample acquisition, medical  
63 record abstraction, sequencing, and data releases are ongoing processes, so these values will  
64 grow as the project continues. Colored boxes indicate the figures that use those values in analysis  
65 and visualization. Values for Fig. 1B shown in this attrition chart may be greater than those  
66 shown in Fig. 1b at the study cutoff date, as Fig. 1B is a snapshot showing values collected as of  
67 June 1, 2020, while this attrition chart includes steps that may have been completed by consented  
68 patient-partners after June 1, 2020.

69 **b)** Real-time and proposed improvements to improve participant recruitment. Several steps in the  
70 study process have been targeted for improvement, with implement and potential changes listed.

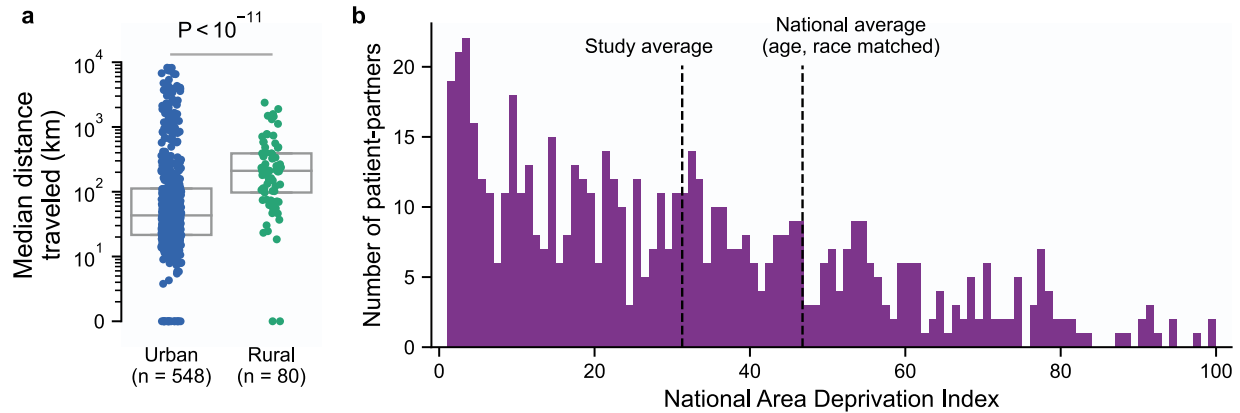

71

72 **Supplementary Figure S7. Additional geographic characteristics of patient-partner**

73 **residential areas, related to Fig. 1D, E.**

74 **a)** Patient-partners in rural areas travel farther for clinical care. Patient-partner residential areas  
 75 were categorized as rural or urban based on USDA rural-urban continuum codes. For each  
 76 patient-partner, the median Haversine round-trip distance between the zip code of their home  
 77 address and that of institutions they visited was calculated (Methods). Patient-partners that live in  
 78 Canada (n = 30), did not provide a residential area (n = 40), or provided only a P.O. box (n = 8)  
 79 are not shown. *P*-value calculated via two sided Mann-Whitney U test.

80 **b)** National Area Deprivation Index (ADI) distribution of patient-partner residential areas.  
 81 Higher values indicate higher degrees of disadvantage. The national average was calculated by  
 82 overlapping census block group populations counts from the U.S. census with public ADI data,  
 83 weighting by age and race matched to the distribution of age and race of patient-partners.

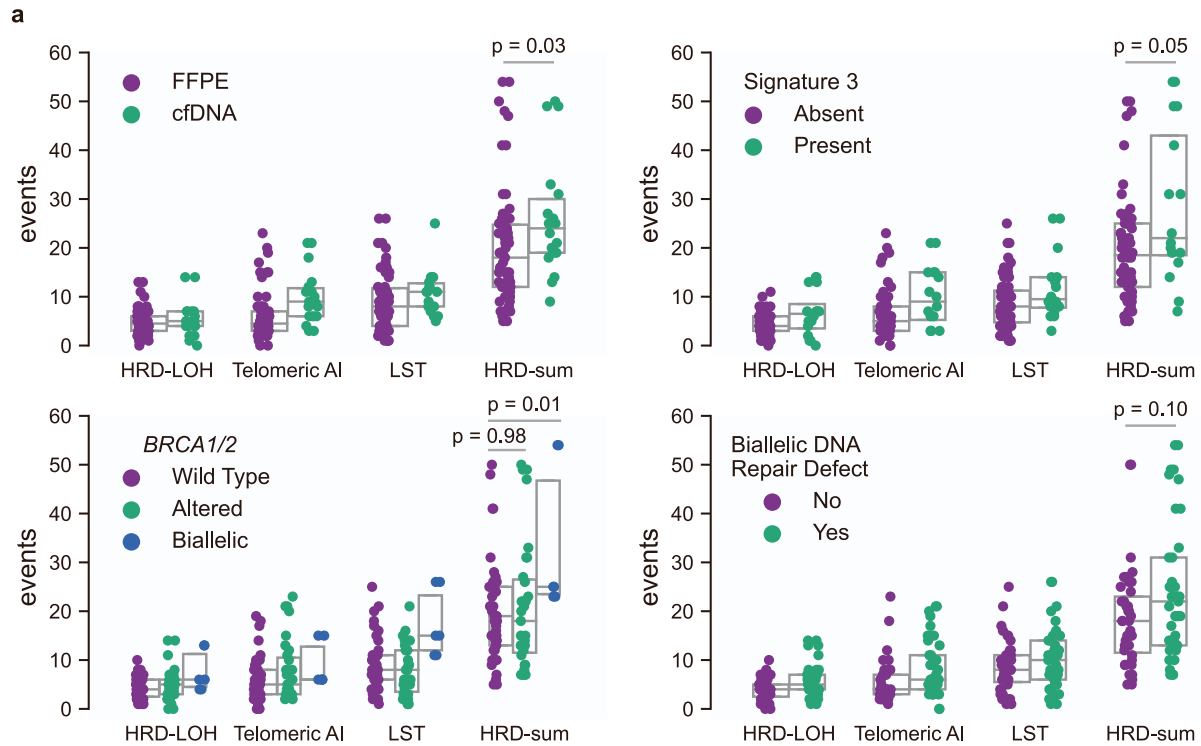

84

85 **Supplementary Figure S8. Associations between sample characteristics and scarHRD**  
 86 **score, related to Fig. 3B.**

87 **a)** Copy number based events associated with homologous recombination deficiency were  
 88 assessed using scarHRD<sup>1</sup> (Methods). These include the number of large (> 15 Mb) loss-of-  
 89 heterozygosity events (HRD-LOH), the number of allelic imbalances that extend to the end of  
 90 the chromosome (Telomeric AI), the number of chromosomal breaks between adjacent regions  
 91 of at least 10 Mb, with a distance between them not larger than 3Mb (LST), and the sum of all  
 92 the previous listed events (HRD-sum). Biallelic DNA repair defects were classified as 1) a  
 93 double deletion, 2) a loss with a protein-altering somatic or pathogenic germline mutation, or 3)  
 94 more than one protein-altering somatic/pathogenic germline mutation, although we cannot  
 95 confirm the biallelic nature of double mutations. Genes used in the biallelic DNA repair defect  
 96 association found in Supplementary Table S3. The association with cfDNA is consistent with

97 prior literature, as the cfDNA samples represent metastatic disease, although we cannot rule out  
98 the confounding influence of analyte type.



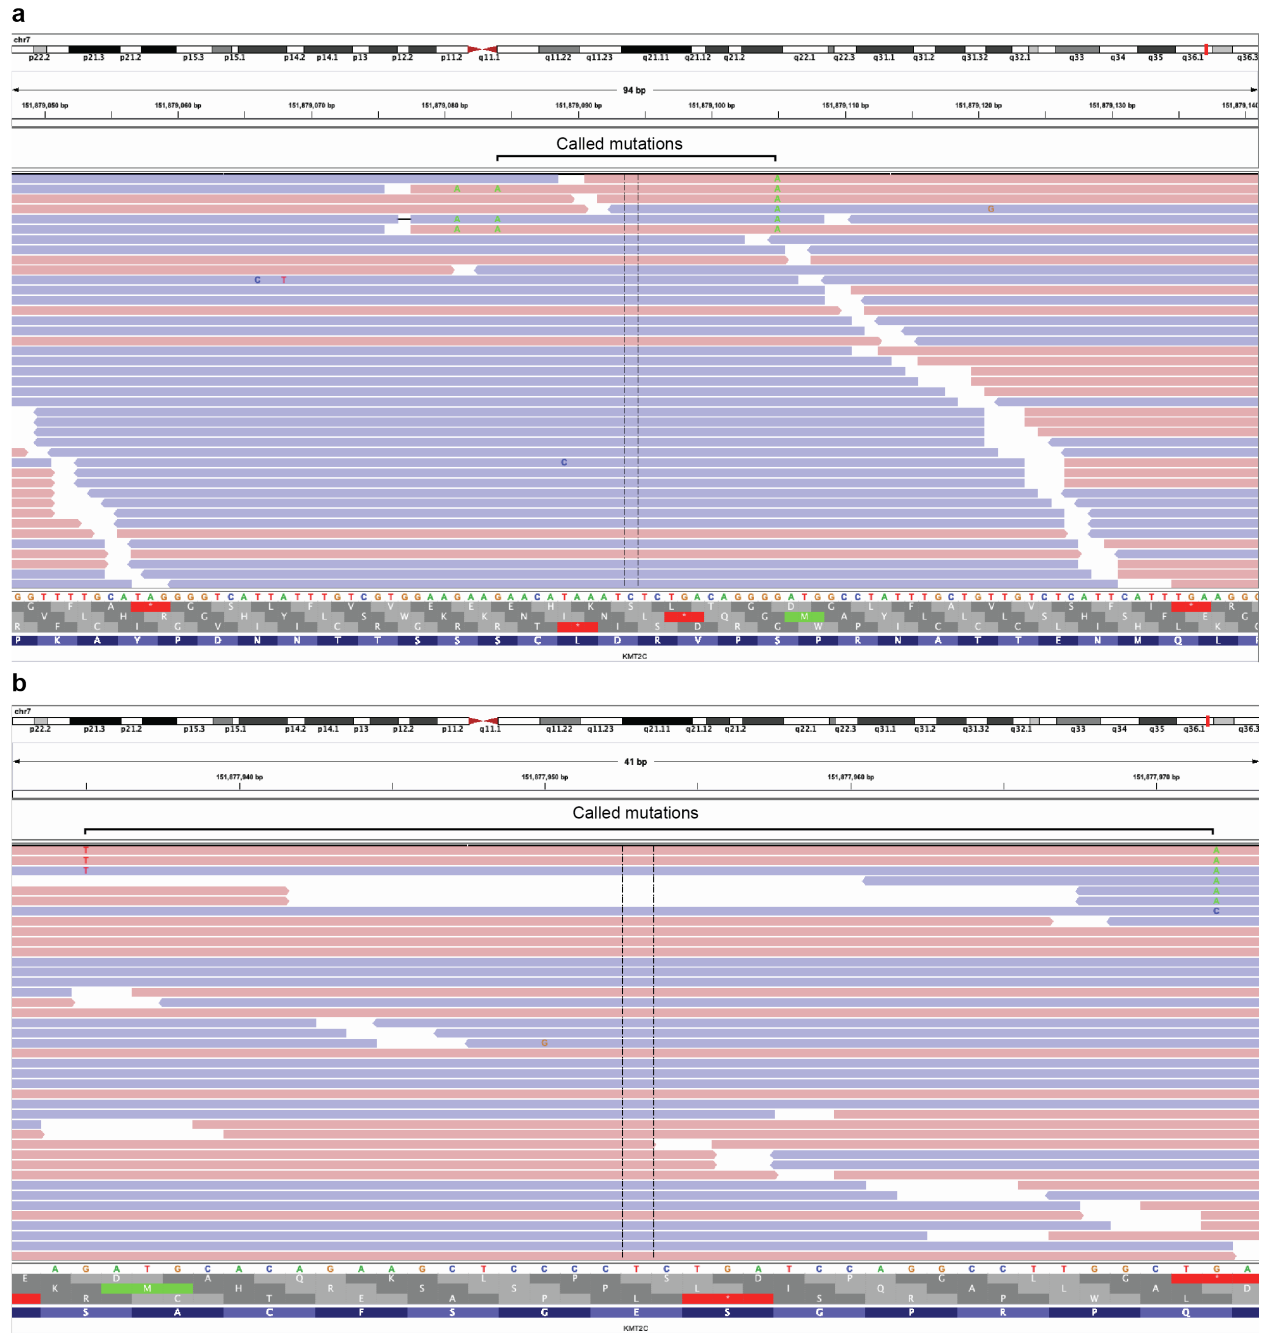

99

100 **Supplementary Figure S9. IGV screenshots of *KMT2C* mutation-sharing reads, related to**  
 101 **Fig. 3C.**

102 **a)** IGV screenshot containing reads that span somatic *KMT2C* mutations

103 (chr7:151879084/p.S1947F and chr7:151879105/p.S1954F) in the cfDNA sample of patient-

104 partner 0203. A mutation may also be present at chr7:151879081 but was rejected by Mutect's  
105 internal filters as it is close to an inferred gap event. Coloring of reads indicates strand.  
106 **b)** IGV screenshot containing reads that span somatic *KMT2C* mutations (chr7:151877972/  
107 p.Q2325\* and chr7:151877935/p.S2337Y). Coloring of reads indicates strand.

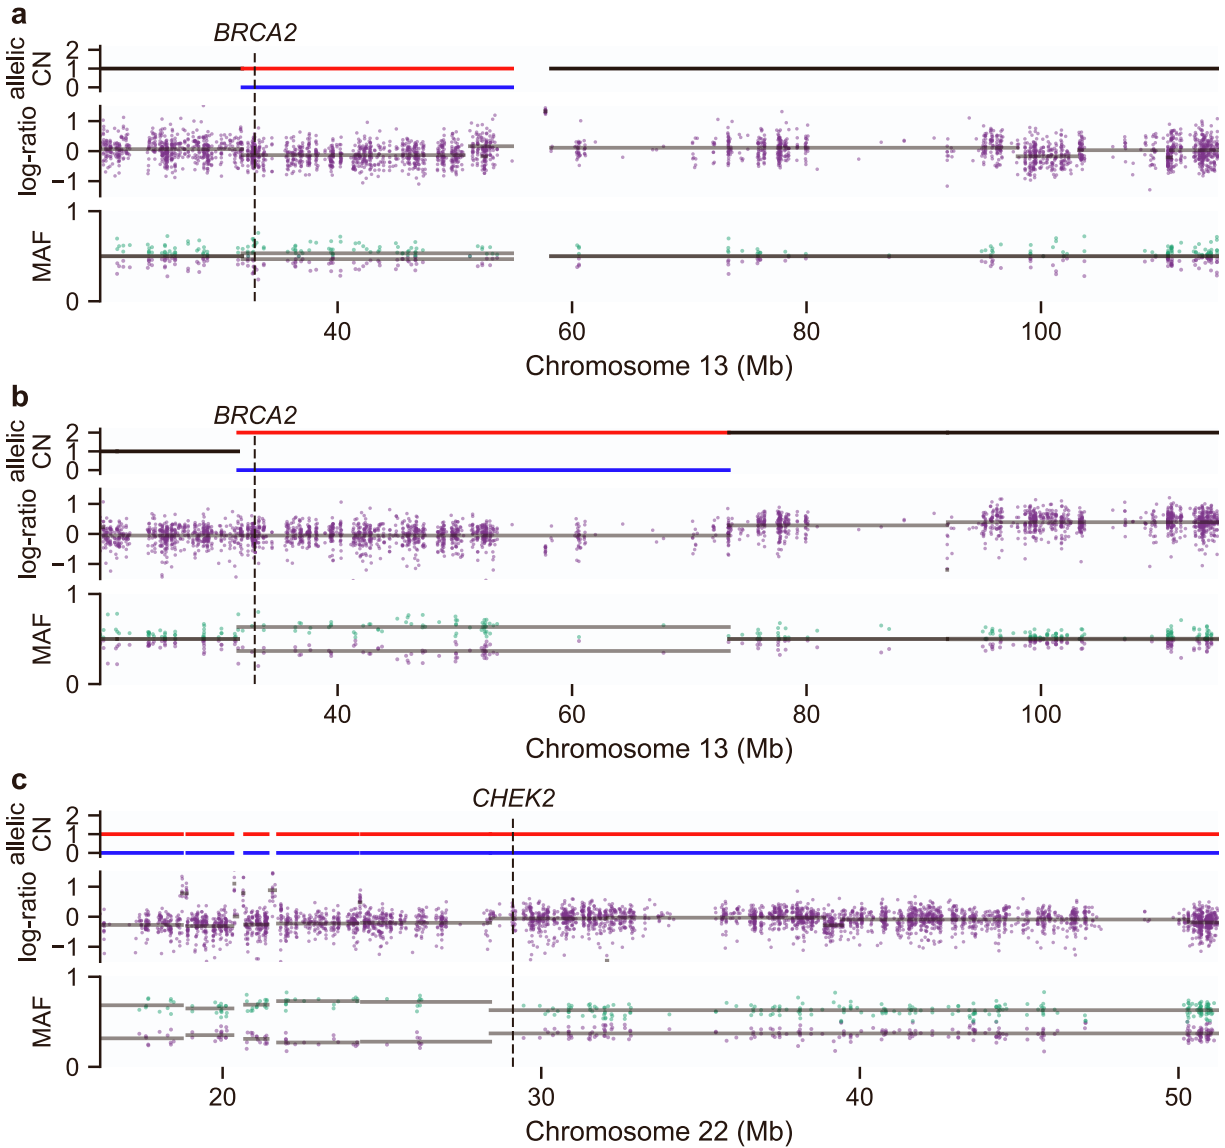

108

109 **Supplementary Figure S10. Somatic losses affecting genes with pathogenic germline**  
 110 **mutations, related to Fig. 3E.**

111 **a-c)** Copy number profiles for three samples with pathogenic germline mutations are shown. The  
 112 top profile of each panel reflects the integer allelic copy number segments, the middle reflects  
 113 log-ratio coverage, and the bottom reflects minor allele fraction (MAF), an indicator of allelic  
 114 balance. The pathogenic germline alterations of these samples are depicted in Supplementary  
 115 Table S5.

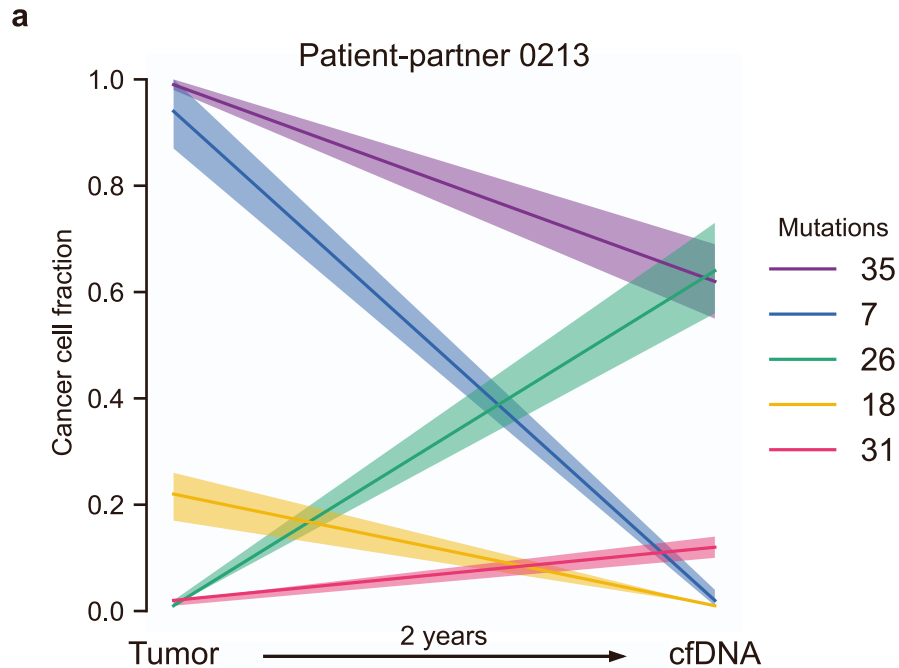

116

117 **Supplementary Figure S11. Phylogenetics of samples from patient-partner 0213, related to**

118 **Fig. 4B.**

119 **a)** The y-axis shows the cancer cell fraction (CCF) of clonal clusters identified between primary

120 tumor and cfDNA from donated blood (x-axis). Colors indicate how many mutations were

121 identified in each clone, with a 95% confidence interval around the estimated CCF. Purple

122 represents the truncal/ancestral clone. The ancestral clone does not reach a CCF of 1 in the

123 cfDNA sample because its inferred purity (0.20) is low, which confounds the ability to

124 accurately quantify CCF.

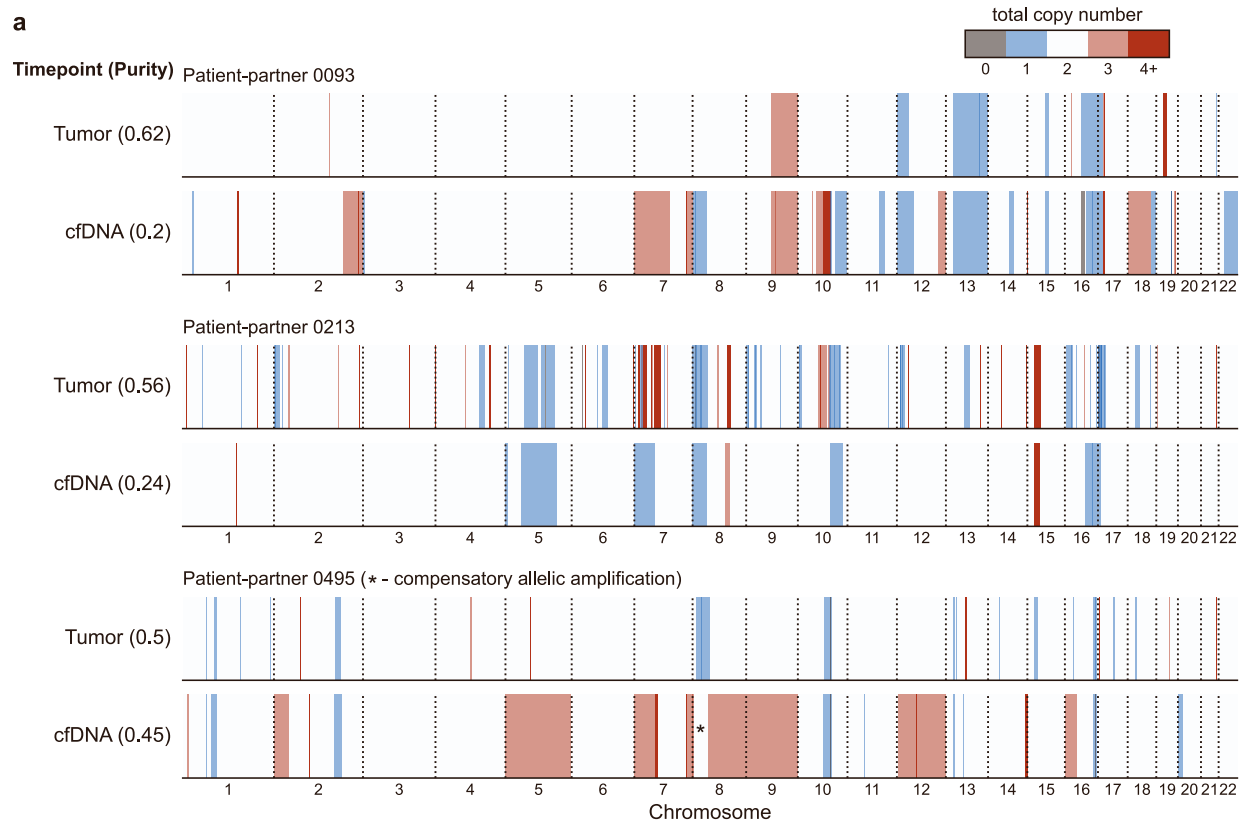

125

126 **Supplementary Figure S12. Copy number profiles of shared tumor and cfDNA samples,**  
 127 **related to Fig. 4B.**

128 **a)** Concordance of copy number profiles between archival primary tumors and donated cfDNA  
 129 samples. The x-axis depicts chromosomal location, with coloring representing copy number  
 130 alterations and their absolute copy number. In general, there are no archival-specific copy  
 131 number alterations, with the potential exception of chr7p amplification in patient-partner 0213.  
 132 When sample purity is below 0.30, focal copy number amplifications can be undetectable. In  
 133 patient-partner 0495's samples, an arm-level deletion of 8p acquired a compensatory  
 134 amplification on the other allele that restored diploid copy number.

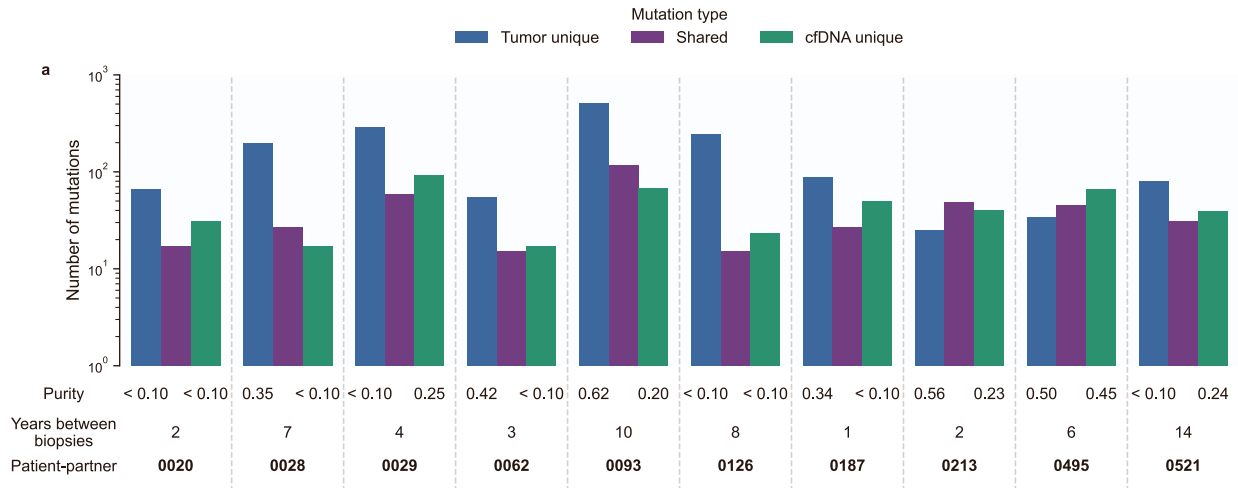

135

136 **Supplementary Figure S13. Mutation exclusivity between tumor and cfDNA samples from**  
 137 **the same patient, related to Fig. 4B.**

138 **a)** Number of mutations for each sample type for ten patient-partners with both archival tumor  
 139 and donated cfDNA samples. The y-axis shows number of mutations, while the x-axis shows  
 140 each patient. The purple and blue bars represent mutations identified exclusively in the archival  
 141 tumor and cfDNA samples, respectively. The green bars represent mutations that had at least one  
 142 supporting read in both tumor and cfDNA samples within the union of all mutations called in  
 143 tumor and cfDNA samples (see Methods – *Phylogenetic analysis*). The purities and amount of  
 144 time between samples are shown below each bar. Purities below 0.10 cannot be accurately  
 145 estimated.

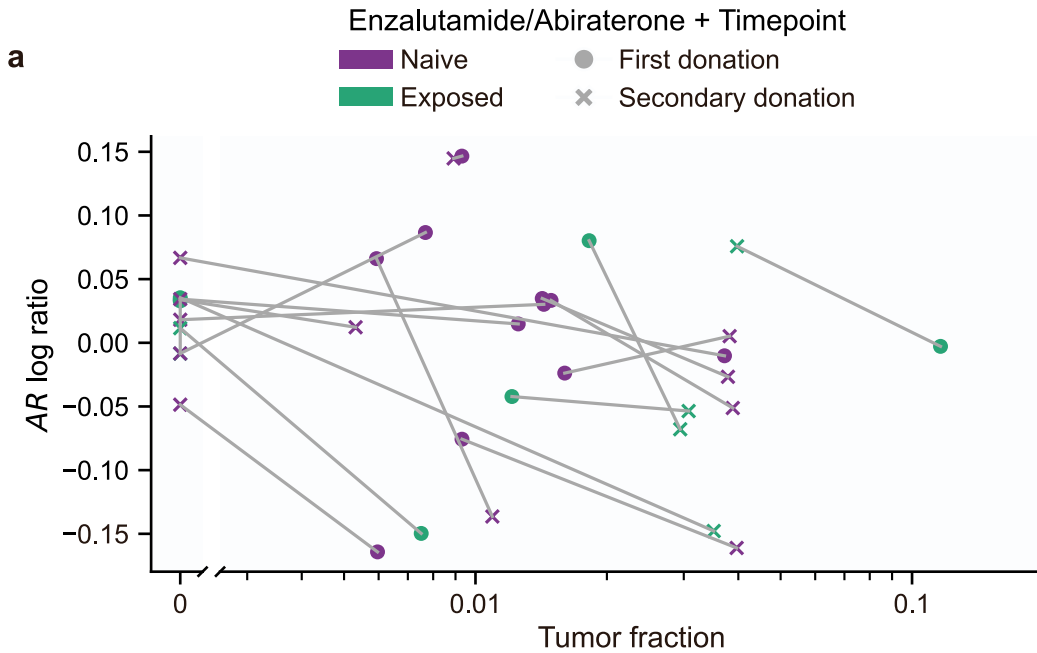

146

147 **Supplementary Figure S14. Shared tumor fraction and *AR* copy-number log-ratios, related**

148 **to Fig. 4D.**

149 **a)** Tumor fraction of 36 cfDNA samples from donated blood of 18 patient-partners with ULP-

150 WGS sequencing is shown on the x-axis, while the log copy-ratio (logR) of the genomic interval

151 containing *AR* is shown on the y-axis. Samples from the same patient-partner are connected with

152 a line. The first sample donated is shown with a circle and the second (usually donated months

153 later) is shown with an 'x'.

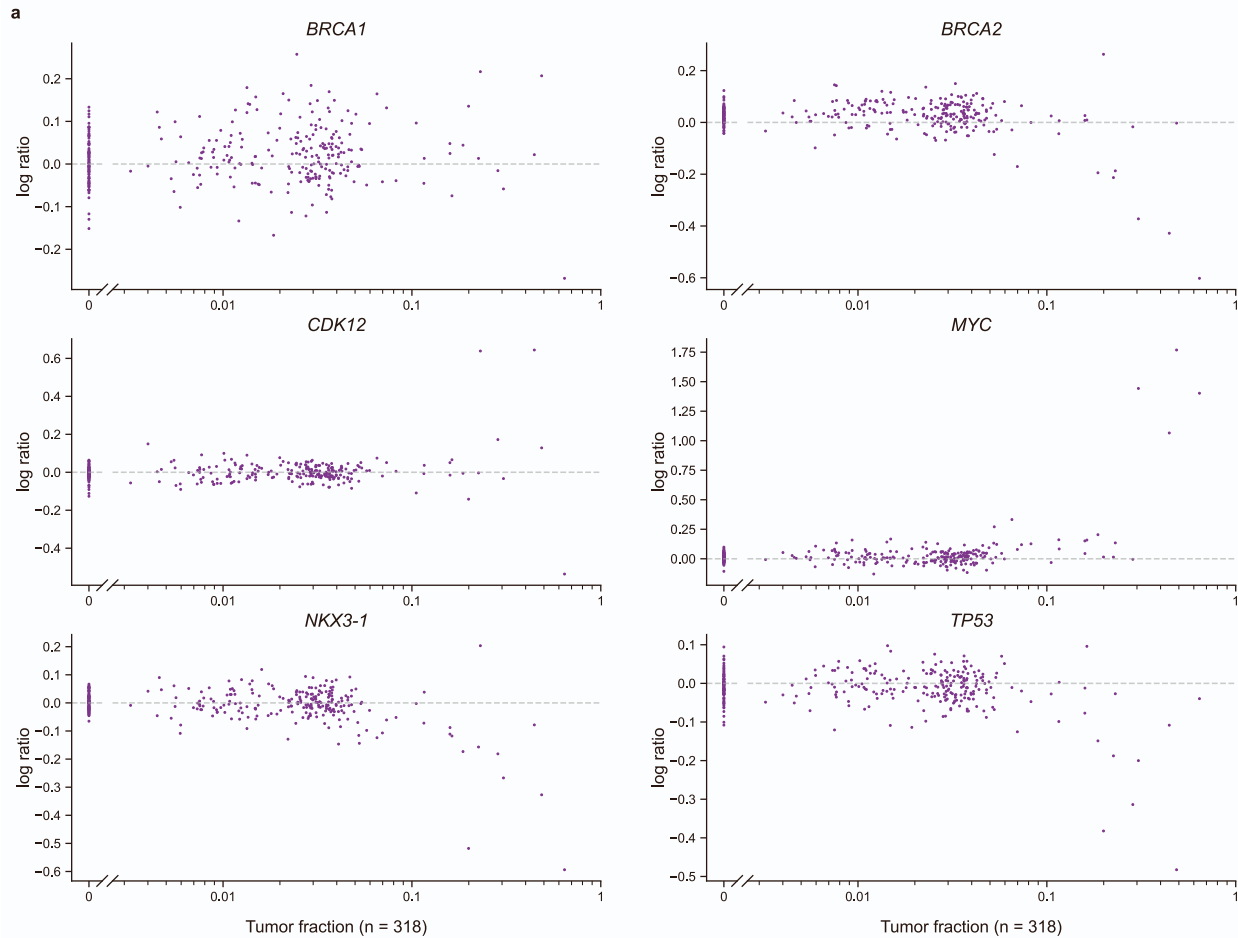

154

155 **Supplementary Figure S15. Ultra-low pass WGS signal for other common copy number**  
 156 **changes in metastatic prostate cancer, related to Fig. 4D.**

157 **a)** Tumor fraction of 318 cfDNA samples from donated blood of 300 patient-partners with ULP-  
 158 WGS sequencing is shown on the x-axis, while the log copy-ratio (logR) of the genomic interval  
 159 containing the gene is shown on the y-axis. In general, deletions are difficult to detect at low  
 160 tumor fractions, as are single or double amplifications (e.g. *MYC*). Signal from *AR* is detectable  
 161 because its amplification often generates dozens of copies. See Adalsteinsson et al. for a more in-  
 162 depth analysis of the sensitivity and sensitivity of ULP-WGS<sup>2</sup>.



| <b>Institution</b>                                    | <b>Patient count</b> | <b>Institution</b>                                            | <b>Patient count</b> |
|-------------------------------------------------------|----------------------|---------------------------------------------------------------|----------------------|
| DANA-FARBER CANCER INSTITUTE                          | 47                   | UC HEALTH - UNIVERSITY OF COLORADO CANCER CENTER              | 4                    |
| UT M. D. ANDERSON CANCER CENTER                       | 29                   | MASSEY                                                        | 3                    |
| HELEN DILLER FAMILY COMPREHENSIVE CANCER CENTER       | 26                   | CARBONE                                                       | 3                    |
| MAYO CLINIC HOSPITAL ROCHESTER                        | 24                   | NORRIS COTTON                                                 | 3                    |
| SIDNEY KIMMEL CANCER CENTER                           | 24                   | COLUMBIA UNIVERSITY IRVING MEDICAL CENTER                     | 3                    |
| MEMORIAL SLOAN HUTCHINSON                             | 19                   | PERLMUTTER CANCER CENTER                                      | 3                    |
|                                                       | 17                   | ROGEL                                                         | 3                    |
| MOUNT SINAI HOSPITAL                                  | 13                   | STEPHENSON CANCER CENTER                                      | 2                    |
| SMILOW CANCER                                         | 12                   | ROSWELL PARK                                                  | 2                    |
| KNIGHT                                                | 11                   | FOX CHASE                                                     | 2                    |
| SITEMAN                                               | 10                   | CITY OF HOPE                                                  | 2                    |
| MOORES CANCER CENTER                                  | 10                   | MASONIC                                                       | 2                    |
| INGRAM CANCER                                         | 8                    | HOLLING                                                       | 2                    |
| SIMON COMPREHENSIVE CANCER                            | 8                    | SYLVESTER                                                     | 2                    |
| NORTHWESTERN                                          | 8                    | HOLDEN                                                        | 2                    |
| DUKE CANCER                                           | 7                    | OHIO STATE UNIVERSITY COMPREHENSIVE CANCER CENTER - THE JAMES | 1                    |
| THE UNIVERSITY OF CHICAGO COMPREHENSIVE CANCER CENTER | 6                    | HILLMAN                                                       | 1                    |
| MOFFITT                                               | 5                    | LINEBERGER                                                    | 1                    |
| UC DAVIS HEALTH - COMPREHENSIVE CANCER CENTER         | 4                    | CHAO FAMILY COMPREHENSIVE CANCER CENTER                       | 1                    |
| UNIVERSITY OF KANSAS CANCER CENTER                    | 4                    | UNIVERSITY OF NEW MEXICO                                      | 1                    |
| STANFORD CANCER INSTITUTE                             | 4                    | BAYLOR                                                        | 1                    |
| RUTGERS CANCER                                        | 4                    | MAYS                                                          | 1                    |
| SIMMONS COMPREHENSIVE CANCER CENTER                   | 4                    | UK MARKEY CANCER CENTER                                       | 1                    |
| WINSHIP                                               | 4                    | THOMAS JEFFERSON                                              | 1                    |
| KECK HOSPITAL OF USC - NORRIS CANCER CENTER           | 4                    | LOMBARDI                                                      | 1                    |

163

164 **Supplementary Table S1. List of NCI-designated cancer centers, related to Fig. 1C.**

165 List of NCI-designated cancer centers along with unique patient-partner attendance counts. For  
166 institutions that have satellite locations, only the main location was considered in tabulating  
167 patient attendance and NCI-designated status. These institutions are depicted in green in Fig. 1c.

| Patient-reported data                               | Number of patient-partners (%) |
|-----------------------------------------------------|--------------------------------|
| <i>Age at initial diagnosis (mean: 61)</i>          |                                |
| Did not respond                                     | 1 (0.1%)                       |
| ≤ 40 years                                          | 4 (0.6%)                       |
| > 40, ≤ 50 years                                    | 62 (8.7%)                      |
| > 50, ≤ 60 years                                    | 256 (35.8%)                    |
| ≥ 60 years                                          | 383 (54.8%)                    |
| <i>What is your race? (Select all that apply)</i>   |                                |
| White                                               | 657 (93.1%)                    |
| Black or African American                           | 12 (1.7%)                      |
| Other (Not specified)                               | 10 (1.4%)                      |
| Japanese                                            | 4 (0.6%)                       |
| Chinese                                             | 4 (0.6%)                       |
| American Indian                                     | 3 (0.4%)                       |
| Prefer to not respond                               | 3 (0.4%)                       |
| Did not respond                                     | 4 (0.4%)                       |
| Southeast Asian or Indian                           | 2 (0.3%)                       |
| American Indian and White                           | 2 (0.3%)                       |
| White, Other (Not specified)                        | 2 (0.3%)                       |
| Japanese and White                                  | 2 (0.3%)                       |
| Japanese, Chinese, Hawaiian, and White              | 1 (0.1%)                       |
| <i>Do you consider yourself Hispanic or Latino?</i> |                                |
| Yes                                                 | 12 (1.7%)                      |
| No                                                  | 689 (97.6%)                    |
| Did not respond                                     | 5 (0.7%)                       |

168 **Supplementary Table S2. Additional patient reported data, related to STAR Methods.**

169 Patient-partner reported demographic data for patient-partners enrolled before June 1, 2020 (n =  
170 706). Age at initial prostate cancer diagnosis is calculated based on the patient reported date of  
171 birth and month/year of initial prostate cancer diagnosis. Patient-partners were free to select as  
172 many racial identities as they identified with.

| <b>Gene</b>    | <b>Info</b> | <b>Gene</b>    | <b>Info</b> | <b>Gene</b>     | <b>Info</b> |
|----------------|-------------|----------------|-------------|-----------------|-------------|
| <i>ABCB11</i>  | O           | <i>FANCI</i>   | O           | <i>RAD51</i>    | R           |
| <i>ACD</i>     | O           | <i>FANCL</i>   | RO          | <i>RAD51B</i>   | R           |
| <i>AIP</i>     | O           | <i>FANCM</i>   | RO          | <i>RAD51C</i>   | RO          |
| <i>ALK</i>     | O           | <i>FH</i>      | O           | <i>RAD51D</i>   | RO          |
| <i>APC</i>     | O           | <i>FLCN</i>    | O           | <i>RAD54L</i>   | R           |
| <i>ATM</i>     | RPO         | <i>GATA2</i>   | O           | <i>RAF1</i>     | O           |
| <i>ATR</i>     | RO          | <i>GEN1</i>    | R           | <i>RB1</i>      | O           |
| <i>AXIN2</i>   | O           | <i>GPC3</i>    | O           | <i>RECQL</i>    | O           |
| <i>BAP1</i>    | RO          | <i>HDAC2</i>   | R           | <i>RECQL4</i>   | O           |
| <i>BARD1</i>   | RO          | <i>HFE</i>     | O           | <i>RET</i>      | O           |
| <i>BLM</i>     | O           | <i>HMBS</i>    | O           | <i>RFWD3</i>    | O           |
| <i>BMPR1A</i>  | O           | <i>HNF1A</i>   | O           | <i>RHBDF2</i>   | O           |
| <i>BRAF</i>    | O           | <i>HOXB13</i>  | PO          | <i>RTEL1</i>    | O           |
| <i>BRCA1</i>   | RPO         | <i>HRAS</i>    | O           | <i>RUNX1</i>    | O           |
| <i>BRCA2</i>   | RPO         | <i>KIT</i>     | O           | <i>SBDS</i>     | O           |
| <i>BRIP1</i>   | RO          | <i>KRAS</i>    | O           | <i>SDHA</i>     | O           |
| <i>BUB1B</i>   | O           | <i>LZTR1</i>   | O           | <i>SDHAF2</i>   | O           |
| <i>CBL</i>     | O           | <i>MAP2K1</i>  | O           | <i>SDHB</i>     | O           |
| <i>CDC73</i>   | O           | <i>MAP2K2</i>  | O           | <i>SDHC</i>     | O           |
| <i>CDH1</i>    | O           | <i>MAX</i>     | O           | <i>SDHD</i>     | O           |
| <i>CDK12</i>   | R           | <i>MEN1</i>    | O           | <i>SETBP1</i>   | O           |
| <i>CDK4</i>    | O           | <i>MET</i>     | O           | <i>SH2D1A</i>   | O           |
| <i>CDKN1B</i>  | O           | <i>MITF</i>    | O           | <i>SLC25A13</i> | O           |
| <i>CDKN1C</i>  | O           | <i>MLH1</i>    | RPO         | <i>SLX4</i>     | O           |
| <i>CDKN2A</i>  | O           | <i>MLH3</i>    | R           | <i>SMAD4</i>    | O           |
| <i>CDKN2B</i>  | O           | <i>MPL</i>     | O           | <i>SMARCA4</i>  | O           |
| <i>CEBPA</i>   | O           | <i>MRE11A</i>  | R           | <i>SMARCB1</i>  | O           |
| <i>CHEK1</i>   | R           | <i>MSH2</i>    | RPO         | <i>SMARCE1</i>  | O           |
| <i>CHEK2</i>   | RPO         | <i>MSH6</i>    | RPO         | <i>SOS1</i>     | O           |
| <i>CYLD</i>    | O           | <i>MTAP</i>    | O           | <i>SPRTN</i>    | O           |
| <i>DDB2</i>    | O           | <i>MUTYH</i>   | O           | <i>SRP72</i>    | O           |
| <i>DDX41</i>   | O           | <i>NBN</i>     | RPO         | <i>STAT3</i>    | O           |
| <i>DICER1</i>  | O           | <i>NF1</i>     | O           | <i>STK11</i>    | O           |
| <i>DIS3L2</i>  | O           | <i>NF2</i>     | O           | <i>SUFU</i>     | O           |
| <i>DKC1</i>    | O           | <i>NHP2</i>    | O           | <i>TERT</i>     | O           |
| <i>EGFR</i>    | O           | <i>NRAS</i>    | O           | <i>TGFBR1</i>   | O           |
| <i>EPCAM</i>   | O           | <i>NTHL1</i>   | O           | <i>TINF2</i>    | O           |
| <i>ERCC1</i>   | O           | <i>PALB2</i>   | RO          | <i>TMEM127</i>  | O           |
| <i>ERCC2</i>   | O           | <i>PDGFRA</i>  | O           | <i>TP53</i>     | O           |
| <i>ERCC3</i>   | RO          | <i>PHOX2B</i>  | O           | <i>TRIM37</i>   | O           |
| <i>ERCC4</i>   | O           | <i>PMS2</i>    | RO          | <i>TSC1</i>     | O           |
| <i>ERCC5</i>   | O           | <i>POLD1</i>   | O           | <i>TSC2</i>     | O           |
| <i>ETV6</i>    | O           | <i>POLE</i>    | O           | <i>TSHR</i>     | O           |
| <i>EXT1</i>    | O           | <i>POLH</i>    | O           | <i>UROD</i>     | O           |
| <i>EXT2</i>    | O           | <i>POT1</i>    | O           | <i>VHL</i>      | O           |
| <i>FAH</i>     | O           | <i>PPP2R2A</i> | R           | <i>WRN</i>      | O           |
| <i>FAM175A</i> | R           | <i>PRF1</i>    | O           | <i>WT1</i>      | O           |
| <i>FANCA</i>   | RO          | <i>PRKAR1A</i> | O           | <i>XPA</i>      | O           |
| <i>FANCC</i>   | O           | <i>PTCH1</i>   | O           | <i>XPC</i>      | O           |
| <i>FANCD2</i>  | O           | <i>PTCH2</i>   | O           | <i>XRCC2</i>    | R           |
| <i>FANCE</i>   | O           | <i>PTEN</i>    | O           | <i>XRCC3</i>    | O           |
| <i>FANCF</i>   | O           | <i>PTPN11</i>  | O           |                 |             |
| <i>FANCG</i>   | O           | <i>RAD50</i>   | R           |                 |             |

174 **Supplementary Table S3. DNA repair and germline cancer susceptibility gene list, related**  
175 **to Fig 3D.**

176 List of genes used for germline analysis in this study. Genes with “R” denote the genes used in  
177 the analysis of the association between the presence of COSMIC2.0 signature 3 and DNA-repair  
178 alterations, taken from Mateo et al. 2015, de Bono et al. 2020, and Pritchard et al. 2016<sup>3-5</sup>. Genes  
179 with “P” denote the list of genes used to evaluate germline alterations in prostate cancer  
180 susceptibility genes, taken from Aldubayan 2019<sup>6</sup>. Genes with “O” denote the list of genes used  
181 to evaluate germline alterations in other cancer susceptibility genes, taken from COSMIC, Huang  
182 et al. 2018, and Rahman 2014<sup>7-9</sup>. See Methods for the specifics of these analyses.

| Therapy brand name (Generic name)      | Category                 | Number of patient-partners (% of 639) |
|----------------------------------------|--------------------------|---------------------------------------|
| <i>Hormones</i>                        |                          |                                       |
| Lupron (Leuprolide)                    | 1 <sup>st</sup> line ADT | 538 (84.2%)                           |
| Casodex (Bicalutamide)                 | 1 <sup>st</sup> line ADT | 326 (51.0%)                           |
| Zytiga (Abiraterone)                   | 2 <sup>nd</sup> line ADT | 220 (34.4%)                           |
| Firmagon (Degarelix)                   | 1 <sup>st</sup> line ADT | 109 (17.1%)                           |
| Xtandi (Enzalutamide)                  | 2 <sup>nd</sup> line ADT | 107 (16.7%)                           |
| Zoladex (Goserelin)                    | 1 <sup>st</sup> line ADT | 38 (5.9%)                             |
| Drogenil (Flutamide)                   | 1 <sup>st</sup> line ADT | 5 (0.8%)                              |
| Nilandron (Nilutamide)                 | 1 <sup>st</sup> line ADT | 5 (0.8%)                              |
| Decapeptyl (Triptorelin)               | 1 <sup>st</sup> line ADT | 3 (0.4%)                              |
| Prostap (Leuprorelin)                  | 1 <sup>st</sup> line ADT | 1 (0.2%)                              |
| Suprefact (Buserelin)                  | 1 <sup>st</sup> line ADT | 0 (0.0%)                              |
| <i>Chemotherapy</i>                    |                          |                                       |
| Taxotere (Docetaxel)                   | Chemotherapy             | 168 (26.3%)                           |
| Jevtana (Cabazitaxel)                  | Chemotherapy             | 18 (2.8%)                             |
| Paraplatin (Carboplatin)               | Chemotherapy             | 17 (2.6%)                             |
| Etopophos / Toposar (Etoposide)        | Chemotherapy             | 5 (0.8%)                              |
| Emcyt (Estramustine)                   | Chemotherapy             | 3 (0.5%)                              |
| Taxol (Paclitaxel)                     | Chemotherapy             | 2 (0.3%)                              |
| Novantrone (Mitoxantrone)              | Chemotherapy             | 1 (0.2%)                              |
| <i>Other Therapy</i>                   |                          |                                       |
| Xgeva/Prolia (Denosumab)               | Supportive care          | 103 (16.2%)                           |
| Provenge (Sipuleucel-T)                | Immunotherapy            | 59 (9.2%)                             |
| Zometa (Zoledronic Acid)               | Supportive care          | 50 (7.9%)                             |
| Xofigo (Radium-223)                    | Nuclear medicine         | 23 (3.6%)                             |
| Keytruda (Pembrolizumab)               | Immunotherapy            | 10 (1.5%)                             |
| Lynparza (Olaparib)                    | PARP inhibitor           | 6 (0.9%)                              |
| Yervoy (Ipilimumab)                    | Immunotherapy            | 3 (0.5%)                              |
| Opdivo (Nivolumab)                     | Immunotherapy            | 2 (0.3%)                              |
| Tecentriq (Atezolizumab)               | Immunotherapy            | 0 (0.0%)                              |
| Rubraca (Rucaparib)                    | PARP inhibitor           | 0 (0.0%)                              |
| Quadramet (Samarium SM 153 lexidronam) | Supportive care          | 0 (0.0%)                              |
| Metastron (Strontium-89)               | Supportive care          | 0 (0.0%)                              |
| <i>Experimental/Clinical Trial</i>     |                          |                                       |
| Experimental/Clinical Trial            | Clinical trial           | 87 (13.6%)                            |

183 **Supplementary Table S4. Therapies available for selection on patient survey, related to Fig.**

184 **2E.**

185 List of therapies available for selection on patient survey (Supplementary Figure S2). Only these

186 therapies were used to determine the overlap between patient-reported therapies and medical

187 record therapies. Percentage defined relative to the number of patient-partners that provided at  
188 least one therapy on the survey (n = 639/706).

| gene                 | consequence       | ClinVar 2019 annotation      | purity | t_ref | t_alt | n_ref | n_alt |
|----------------------|-------------------|------------------------------|--------|-------|-------|-------|-------|
| <i>BRCA2</i> (S10-a) | splice acceptor   | Pathogenic/Likely pathogenic | 0.25   | 31    | 37    | 25    | 23    |
| <i>BRCA2</i> (S10-b) | stop gained       | Pathogenic                   | 0.24   | 5     | 10    | 21    | 27    |
| <i>BRCA2</i>         | frameshift        | Pathogenic                   | 0.2    | 17    | 7     | 6     | 6     |
| <i>BRCA2</i>         | frameshift        | Pathogenic                   | -      | 183   | 181   | 127   | 101   |
| <i>BUB1B</i>         | stop gained       | Pathogenic                   | 0.54   | 351   | 324   | 103   | 108   |
| <i>CHEK2</i>         | frameshift        | Conflicting                  | 0.73   | 89    | 42    | 56    | 40    |
| <i>CHEK2</i>         | missense          | Conflicting                  | 0.52   | 75    | 38    | 69    | 58    |
| <i>CHEK2</i>         | frameshift        | Conflicting                  | 0.5    | 48    | 33    | 74    | 52    |
| <i>CHEK2</i>         | frameshift        | Conflicting                  | -      | 89    | 59    | 196   | 155   |
| <i>CHEK2</i>         | missense          | Conflicting                  | -      | 110   | 93    | 84    | 61    |
| <i>CHEK2</i> (S10-c) | missense          | Pathogenic/Likely pathogenic | 0.62   | 88    | 151   | 95    | 129   |
| <i>CHEK2</i>         | missense          | Conflicting                  | -      | 5     | 4     | 72    | 64    |
| <i>ERCC2</i>         | missense          | Pathogenic                   | -      | 150   | 201   | 93    | 96    |
| <i>FANCD2</i>        | stop gained       | -                            | -      | 197   | 122   | 117   | 72    |
| <i>FANCL</i>         | inframe deletion  | Conflicting                  | 0.53   | 28    | 17    | 102   | 94    |
| <i>FH</i>            | missense          | Conflicting                  | 0.56   | 136   | 132   | 96    | 70    |
| <i>FH</i>            | inframe insertion | Conflicting                  | 0.3    | 201   | 76    | 138   | 84    |
| <i>HOXB13</i>        | missense          | risk factor                  | -      | 139   | 103   | 52    | 49    |
| <i>HOXB13</i>        | missense          | risk factor                  | -      | 238   | 222   | 52    | 49    |
| <i>HOXB13</i>        | missense          | risk factor                  | 0.5    | 177   | 143   | 96    | 85    |
| <i>NBN</i>           | frameshift        | Pathogenic                   | -      | 30    | 6     | 35    | 25    |
| <i>NF1</i>           | missense          | Pathogenic                   | -      | 241   | 124   | 142   | 63    |
| <i>NF1</i>           | splice donor      | Pathogenic                   | -      | 173   | 140   | 136   | 103   |
| <i>SBDS</i>          | splice donor      | Pathogenic                   | 0.2    | 91    | 40    | 80    | 45    |
| <i>SBDS</i>          | splice donor      | Pathogenic                   | -      | 180   | 75    | 125   | 53    |
| <i>CHEK2</i>         | frameshift        | Pathogenic/Likely pathogenic | -      | -     | -     | 63    | 51    |
| <i>SBDS</i>          | splice donor      | Pathogenic                   | -      | -     | -     | 84    | 46    |

189

190 **Supplementary Table S5. Pathogenic germline mutations associated with cancer**

191 **heritability and their presence in tumor samples, related to Fig. 3D, E.**

192 26 pathogenic germline mutations from 25 germline DNA samples were identified among 132

193 sequenced samples, using a curated list of genes associated with cancer heritability (Methods).

194 The tumor reference, tumor alt, normal reference, and normal alt read counts are shown as t\_ref,

195 t\_alt, n\_ref, n\_alt, respectively. Pathogenic germline mutations with an accompanying somatic

196 deletion depicted in Supplementary Fig. S10 are listed under “gene”. “Conflicting” refers to

197 “Conflicting\_interpretations\_of\_pathogenicity”. Dashes indicate missing data, either because the

198 tumor purity was too low to pass quality control or because no tumor was sequenced.

199

200 **Supplementary Methods**

201 **Table of Contents**

|     |                                                          |    |
|-----|----------------------------------------------------------|----|
| 202 | <b>Patient Enrollment and Study Material Acquisition</b> | 33 |
| 203 | Establishing patient partnership                         | 33 |
| 204 | Patient Enrollment and Informed Consent                  | 33 |
| 205 | Medical Records                                          | 35 |
| 206 | Samples                                                  | 36 |
| 207 | Saliva                                                   | 36 |
| 208 | Archived Tumor Tissue                                    | 36 |
| 209 | Primary and Secondary Blood Samples                      | 37 |
| 210 | <b>Data Generation</b>                                   | 38 |
| 211 | Medical Record Abstraction                               | 38 |
| 212 | Patient-Reported Data                                    | 5  |
| 213 | Study inclusion                                          | 5  |
| 214 | Cleaning/categorization                                  | 5  |
| 215 | Medical Institutions                                     | 5  |
| 216 | Therapies                                                | 5  |
| 217 | Alternative lifestyles                                   | 38 |
| 218 | Genomic Sequencing                                       | 40 |
| 219 | DNA Isolation                                            | 40 |
| 220 | Saliva                                                   | 40 |
| 221 | cfDNA Extraction from Whole Blood                        | 41 |



|     |                                                                           |    |
|-----|---------------------------------------------------------------------------|----|
| 222 | Ultra-Low Pass Whole Genome Sequencing (ULP-WGS)                          | 41 |
| 223 | non-UMI ULP-WGS sequencing [dates: 2017-2/11/2018]                        | 41 |
| 224 | UMI ULP-WGS sequencing [dates: 2/12/2018-6/1/2020]                        | 42 |
| 225 | Whole Exome Sequencing (WES)                                              | 44 |
| 226 | Express WES for saliva and tissue [dates: 8/13/2017 - 4/15/2018]          | 44 |
| 227 | Express WES for saliva and tissue [dates: 4/15/2018-6/1/2020]             | 45 |
| 228 | Deep ICE Exome from Non-UMI Enabled ULP Libraries Methods [dates:         |    |
| 229 | previous to 8/13/2017]                                                    | 47 |
| 230 | Deep ICE Exome from UMI-Enabled ULP Libraries [dates: 8/13/2017-6/1/2020] |    |
| 231 |                                                                           | 48 |
| 232 | <b>References</b>                                                         | 49 |

233 ***Patient Enrollment and Study Material Acquisition***

234 Establishing patient partnership

235 Patients and the extended metastatic prostate community have been directly involved in  
236 the creation and development of the Metastatic Prostate Cancer Project (MPCproject) since the  
237 project's conception. During the initial development of the project, a patient advisory council  
238 (PAC) comprised of patients, loved ones, and advocates met frequently with study staff to  
239 determine the study's approach for outreach, patient enrollment, study website design, and  
240 sample collection, among other details of project operations. Study staff from the project  
241 continue to meet regularly with the PAC. In addition to working with members of the PAC, the  
242 MPCproject leverages the expertise of the many prostate cancer advocacy group partners to  
243 improve outreach and project operations. Finally, patients that are not directly involved in the  
244 PAC or an advocacy group, can learn about and partner with the project through various social  
245 media platforms, newsletters, or educational materials generated by study staff to provide input  
246 or feedback.

247 This study includes as authors patient advocates who were instrumental in survey design,  
248 project development, assessment of patient criteria, and outreach strategy. The MPCproject  
249 glossary included with the study was reviewed by practicing oncologists, patient advocates, and  
250 study staff.

251 Patient Enrollment and Informed Consent

252 The MPCproject is a decentralized, online patient-partnered genomics research study.  
253 Patients anywhere in the United States and Canada can visit the project website  
254 (<https://mpcproject.org>) to learn about the research initiative and register for the study. If a  
255 patient is interested in participating, the online registration process has four steps: registration, an

256 optional intake survey, an electronic consent form, and a medical record release form. For the  
257 study, we consider any patient that completes the consent form to be enrolled.

258         On the study registration page, a patient provides their first and last name, email, and  
259 confirmation of their metastatic or advanced prostate cancer diagnosis as well as  
260 acknowledgement of their willingness to provide further information on their medical care and  
261 experience with the disease. The registration page prompts patients to create a password  
262 protected account to save provided information and to allow patients to revisit their completed  
263 survey and forms at any time. Once the account has been created, registrants are taken to an  
264 optional intake survey (Supplementary Fig. S2) where they are asked to provide basic  
265 demographic information as well as answer questions about their experience with prostate cancer  
266 via a 17-question survey that was developed in partnership with clinicians, researchers, and  
267 patients. Each question is optional and survey responses can be revisited. To submit the survey,  
268 patients agree to the MPCproject saving their survey information, and, if they live in the U.S. or  
269 Canada, agree to study staff reaching out if the MPCproject conducts future studies. The  
270 minimum requirement to submit the survey is providing country of origin and a zip code.

271         Registrants that choose to submit the survey and who reside in the U.S. or Canada are  
272 then taken to an electronic consent form. Patients provide informed consent using a web-based  
273 consent form as approved by the Dana-Farber/Harvard Cancer Center Institutional Review Board  
274 (DF/HCC Protocol 15-057B). To formally enroll in the study, patients provide their electronic  
275 signature on the consent form. The consent form provides various levels of participation. The  
276 minimum consent enables study staff to request and abstract medical records, send the patient a  
277 saliva kit, perform germline sequencing analysis if a saliva sample is returned, and release de-  
278 identified clinical and genomic data into public repositories. Patients have the additional option

279 of consenting to study staff obtaining archived tumor tissue and/or blood sample(s) for further  
280 somatic and germline sequencing analyses. Email reminders are sent to registrants who have not  
281 completed the consent process (weekly for three weeks, and again at six weeks). A copy of the  
282 completed consent form is saved in the patient's account and emailed to them.

283         Upon submission of the consent form, the final step in the study enrollment process is to  
284 complete a medical release form. On this form, patients provide their contact information and  
285 information about any physician or hospital involved in the care of their prostate cancer. By  
286 submitting the release form, patients agree to study staff reaching out to the listed institutions to  
287 requested medical records and, if elected on the electronic consent form, archived tissue samples.  
288 Email reminders are sent weekly for three weeks, and again at six weeks, to registrants who have  
289 not completed the release form. A copy of the completed release form is saved in the patient's  
290 account and emailed to them.

#### 291 Medical Records

292         After patients complete the consent and release forms and provide institutions where they  
293 received care for their prostate cancer, the study staff requests their medical records. Study staff  
294 call each institution's medical record departments to obtain copies of the patient's records  
295 starting at the date of diagnosis of prostate cancer through the day of the faxed request. Requests  
296 are faxed to the respective departments after phone confirmation of the fax number. Medical  
297 records are returned to the project via mail, fax, or online portals. Once a medical record arrives,  
298 it is saved in an electronic format in a secure database. If a record request is not fulfilled in 6  
299 months, a second request is submitted. If the medical records department requires additional  
300 paperwork or signatures per the specific institution's release requirements, the patient is  
301 contacted and asked to provide the additional required forms. When patients are contacted for

302 this purpose, study staff are clear that this additional step is optional for patients. Study staff can  
303 also request subsequent medical records after an initial request had been fulfilled if the need  
304 arises.

### 305 Samples

306 All patients that complete the electronic consent form are sent a saliva kit to provide a  
307 saliva sample. In addition, patients can opt-in to providing archival tumor tissue and/or one or  
308 more blood samples.

### 309 *Saliva*

310 Saliva kits are sent to patients who complete the consent and medical release form and  
311 provide a valid mailing address in the United States or Canada. Staff at the Broad Institute  
312 Genomics Platform prepare each unique patient's kit by assigning it a unique barcode and  
313 prepaid business reply-label and packaging the kit with instructions for the patient on how to  
314 provide at least 2 mL of saliva in a DNA Genotek Oragene Discover (OGR-600) tube labeled  
315 with a matching barcode. All kits are affixed with a prepaid business-reply label. Samples are  
316 mailed back to the Broad Institute by patients after collection, and then logged and stored at  
317 room temperature by study staff upon receipt. Saliva samples are eventually pushed for whole  
318 exome sequencing to obtain germline DNA once matched tumor samples are also received and  
319 submitted for sequencing.

### 320 *Archived Tumor Tissue*

321 Once a patient's medical record and normal normal sample (saliva or blood) are received,  
322 study staff review the record to confirm the patient has had a clinical diagnosis of metastatic or  
323 advanced prostate cancer. Surgical and pathology records are used to develop a patient's surgical  
324 history and identify archived formalin-fixed paraffin embedded (FFPE) prostate cancer tumor

325 tissue that may be requested. Study staff, in collaboration with oncologists and pathologists,  
326 developed strict guidelines for selecting which tumor sample to request to obtain the minimal  
327 amount of tissue that will not interfere with the patient's future clinical care. For each patient, a  
328 specific sample is requested only there are at least three blocks with prostatic adenocarcinoma  
329 and at minimum two of those blocks are actively being stored in the source pathology  
330 department. If a sample meets the requesting criteria, study staff coordinate with the sending  
331 pathology department to fax a request and obtain the sample via mail. The tissue request form  
332 requests that pathology departments send an H&E slide along with either an entire block from  
333 the surgical case or 5-20 5-micron unstained slides from a block. All tissue requests submitted by  
334 the MPCproject state that no sample should be exhausted to fulfill the request. Tissue samples  
335 received as blocks are labeled with unique numerical identifiers and sent to the Dana-  
336 Farber/Harvard Cancer Center Specialized Histopathology Services (SHS) Core to be cut into  
337 three 30- micron scrolls per block and an accompanying H&E for tumor confirmation. Scrolls,  
338 unstained slides, and H&Es are labeled with unique barcode identifiers. Archived tumor tissue  
339 with a matched germline sample (from either saliva or a blood sample's buffy coat) are sent to  
340 the Broad Institute's Genomics Platform for whole exome sequencing.

#### 341 *Primary and Secondary Blood Samples*

342 Blood sample acquisition and sequencing preparation are performed as described in  
343 Painter et al. 2020 except in the additional steps of sending secondary blood kits to patients<sup>10</sup>.  
344 The MPCproject was awarded a grant to send a cohort of selected patients second blood kits to  
345 obtain an additional blood sample to study tumor evolution. Patients are selected based on a  
346 combination of criteria including date of registration, date of primary blood draw, primary blood  
347 sample containing sufficient ctDNA quantity for whole exome sequencing, and successful

348 acquisition of medical records. An email is sent to selected patients describing the intent and  
349 optional nature of the second blood kit. The email contains a link to a new consent form and asks  
350 if they would be willing to provide an additional blood sample. If the patient selects ‘Yes’ on the  
351 consent form, another round of the blood sample acquisition process is triggered: a new blood kit  
352 is sent to their home, returned to the Broad Institution, and processed using the same procedure  
353 outlined for their primary kit.

### 354 ***Data Generation***

#### 355 Medical Record Abstraction

356 Medical records are requested for any consented patient in the US and Canada that listed  
357 any institution(s) from which they received care on their medical release form. Medical records  
358 arrive in various formats and all are eventually transferred to an electronic format and stored on a  
359 secure internal server. Scanned medical records are run through the Optical Character  
360 Recognition (OCR) engine known as Tesseract (LSTM model inside Tesseract version 4.0;  
361 (<https://github.com/tesseract-ocr/tesseract>)) to facilitate manual abstraction by study staff.

362 Three separate abstractors on the study staff team are involved in the abstraction and  
363 quality control process of the clinical data from each searchable record. To begin, two abstractors  
364 independently read and isolate the same clinical information for each patient. A third abstractor  
365 aligns the separate abstractions and identifies field-specific discrepancies between the two  
366 abstractions. The third abstractor attempts to resolve any lack of concordance by returning to the  
367 patient’s medical record to identify the correct data. At any point in the process, abstractors can  
368 work with clinical oncologists to answer questions or address lack of concordance.

369 The abstractors use a clinical data dictionary comprising 60 fields that was curated by  
370 prostate cancer oncologists. For information that's not found, it was abstracted as 'NOT FOUND

371 IN RECORD'. In instances where ambiguity or incomplete data was present, inferences were  
372 made considering the whole narrative of the medical record. The dictionary includes possible  
373 responses for each field. For date-type fields, incomplete dates missing either the month or day,  
374 are abstracted as the first month of the year and/or first day of the month, respectively. All time  
375 related fields are anchored from the date of primary prostate cancer diagnoses. For example, a  
376 patient's metastatic diagnosis date is represented as the calculated number of days from the  
377 primary diagnosis date to the metastatic diagnosis date. This was done to protect patient privacy.

### 378 Patient-Reported Data

#### 379 *Study inclusion*

380 Survey responses were cleaned for patients that completed their consent and release  
381 forms and submitted a survey by June 1, 2020. 706 of these patients reported being located  
382 within the U.S. and Canada and were thus included in downstream analyses.

#### 383 *Cleaning/categorization of medical institutions*

384 Patients were asked in their medical release form to report all physicians with whom they  
385 received care for their prostate cancer, institutions where they received an initial prostatic biopsy  
386 or prostatectomy, and institutions where they received another surgery related to their prostate  
387 cancer. Institutions of reported physicians were gathered based on the most recent affiliation  
388 identified from affiliated websites. Satellite locations of larger institutions were considered  
389 separate institutions. Names were standardized by three separate reviewers manually. For Fig 1c,  
390 only unique institutions for each patient are shown. The NCI designated cancer center list was  
391 taken from [cancer.gov/research/infrastructure/cancer-centers/find](https://cancer.gov/research/infrastructure/cancer-centers/find).

#### 392 *Cleaning/categorization of therapies*

393 Patients selected all therapies that they had received for their prostate cancer in the intake



394 survey. Therapies were categorized by prostate cancer oncologists into broad treatment  
395 categories according to their primary therapeutic function (See Supplementary Table S4).

#### 396 *Cleaning/categorization of alternative lifestyles*

397 Patient responses to question 7 on the intake survey (Supplementary Fig. S2) were  
398 categorized into four broad categories: Diet/lifestyle, Supplements, and Non-Cancer Therapies.  
399 Except for plant-based diet and unspecified diet change, responses were not mutually exclusive.  
400 Different methods of taking similar supplements (e.g., turmeric paste, turmeric capsules,  
401 turmeric powder) were considered the same supplement. Brand name products were converted to  
402 generic forms (e.g., Pomi-T was considered “pomegranate”). Manual classification was  
403 conducted by two separate reviewers.

#### 404 Genomic Sequencing

405 All samples were received and sequenced at the Broad Institute’s Genomics Platform.  
406 Due to changes in sequencing methods as a function of improved technologies and the  
407 longitudinal nature of this project, certain sequencing methods are subset by date to indicate  
408 what was applied for samples received within the specific timeframe.

#### 409 *DNA Isolation in Saliva*

410 DNA was extracted via the Chemagic MSM I with the Chemagic DNA Blood Kit-96  
411 from Perkin Elmer. This kit combines a chemical and mechanical lysis with magnetic bead-based  
412 purification. Saliva samples were incubated at 50°C for 2 hours. The saliva was then transferred  
413 to a deep well plate placed on the Chemagic MSM I. The following steps were automated on the  
414 MSM I.

415 M-PVA Magnetic Beads were added to the saliva. Lysis buffer was added to the solution  
416 and mixed. The bead-bound DNA was then removed from solution via a 96-rod magnetic head

417 and washed in three Ethanol-based wash buffers. The beads were then washed in a final water  
418 wash buffer. Finally, the beads were dipped in elution buffer to resuspend the DNA sample in  
419 solution. The beads were then removed from solution, leaving purified DNA eluate. DNA  
420 samples were quantified using a fluorescence based PicoGreen assay.

#### 421 *cfDNA Extraction from Whole Blood*

422 Whole blood was collected in EDTA, CellSave, or Streck tubes and processed for plasma  
423 fractionation. Blood tubes were centrifuged at 1900 g for 10 minutes and plasma was transferred  
424 to second tube before further centrifugation at 15000 g for 10 minutes. Supernatant plasma was  
425 stored at -80C until cfDNA extraction. cfDNA was extracted using the QIASymphony DSP  
426 Circulating DNA Kit according to the manufacturer's instructions, with 6.3 mL of plasma as  
427 input and with a 60 uL DNA elution (Qiagen, 2017).

#### 428 *Ultra-Low Pass Whole Genome Sequencing (ULP-WGS)*

429 non-UMI ULP-WGS sequencing [dates: 2017-2/11/2018]:

##### 430 1. Library Construction

431 Initial DNA input is normalized to be within the range of 25-52.5 ng in 50 uL of TE  
432 buffer (10mM Tris HCl 1mM EDTA, pH 8.0) according to picogreen quantification. For adapter  
433 ligation, Illumina paired end adapters were replaced with palindromic forked adapters, purchased  
434 from Integrated DNA Technologies, with unique dual-indexed molecular barcode sequences to  
435 facilitate downstream pooling. With the exception of the palindromic forked adapters, the  
436 reagents used for end repair, A-base addition, adapter ligation, and library enrichment PCR were  
437 purchased from KAPA Biosciences in 96-reaction kits. In addition, during the post-enrichment  
438 SPRI cleanup, elution volume was reduced to 30µL to maximize library concentration, and a  
439 vortexing step was added to maximize the amount of template eluted.

440

## 441 2. Post Library Construction Quantification and Normalization

442 Library quantification was performed using the Invitrogen Quant-It broad range dsDNA  
443 quantification assay kit (Thermo Scientific Catalog: Q33130) with a 1:200 PicoGreen dilution.  
444 Following quantification, each library is normalized to a concentration of 25 ng/ $\mu$ L, using a 1X  
445 Low TE pH 7.0 solution.

## 446 3. Library Pool Creation for Ultra-low Pass Sequencing

447 In preparation for the sequencing of the ultra-low pass libraries (ULP), approximately 4  
448  $\mu$ L of the normalized library is transferred into a new receptacle and further normalized to a  
449 concentration of 2ng/ $\mu$ L using Tris-HCl, 10mM, pH 8.0. Following normalization, up to 95  
450 ultra-low pass WGS samples are pooled together using equivolume pooling. The pool is  
451 quantified via qPCR and normalized to the appropriate concentration to proceed to sequencing.

## 452 4. Cluster amplification and sequencing

453 Cluster amplification of library pools was performed according to the manufacturer's  
454 protocol (Illumina) using Exclusion Amplification cluster chemistry and HiSeq X flowcells.  
455 Flowcells were sequenced on v2 Sequencing-by-Synthesis chemistry for HiSeq X flowcells. The  
456 flowcells are then analyzed using RTA v.2.7.3 or later. Each pool of ultra-low pass whole  
457 genome libraries is run on one lane using paired 151bp runs.

458 UMI ULP-WGS sequencing [dates: 2/12/2018-6/1/2020]:

### 459 1. Library Construction

460 Initial DNA input is normalized to be within the range of 25-52.5 ng in 50  $\mu$ L of TE  
461 buffer (10mM Tris HCl 1mM EDTA, pH 8.0) according to picogreen quantification. Library  
462 preparation is performed using a commercially available kit provided by KAPA Biosystems

463 (KAPA HyperPrep Kit with Library Amplification product KK8504) and IDT's duplex UMI  
464 adapters. Unique 8-base dual index sequences embedded within the p5 and p7 primers  
465 (purchased from IDT) are added during PCR. Enzymatic clean-ups are performed using  
466 Beckman Coulter AMPure XP beads with elution volumes reduced to 30 $\mu$ L to maximize library  
467 concentration.

## 468 2. Post Library Construction Quantification and Normalization

469 Library quantification was performed using the Invitrogen Quant-It broad range dsDNA  
470 quantification assay kit (Thermo Scientific Catalog: Q33130) with a 1:200 PicoGreen dilution.  
471 Following quantification, each library is normalized to a concentration of 35 ng/ $\mu$ L, using Tris-  
472 HCl, 10mM, pH 8.0.

## 473 3. Library Pool Creation for Ultra-low Pass Sequencing

474 In preparation for the sequencing of the ultra-low pass libraries (ULP), approximately 4  
475  $\mu$ L of the normalized library is transferred into a new receptacle and further normalized to a  
476 concentration of 2ng/ $\mu$ L using Tris-HCl, 10mM, pH 8.0. Following normalization, up to 95  
477 ultra-low pass WGS samples are pooled together using equivolume pooling. The pool is  
478 quantified via qPCR and normalized to the appropriate concentration to proceed to sequencing.

## 479 4. Cluster amplification and sequencing

480 Cluster amplification of library pools was performed according to the manufacturer's  
481 protocol (Illumina) using Exclusion Amplification cluster chemistry and HiSeq X flowcells.  
482 Flowcells were sequenced on v2 Sequencing-by-Synthesis chemistry for HiSeq X flowcells. The  
483 flowcells are then analyzed using RTA v.2.7.3 or later. Each pool of ultra-low pass whole  
484 genome libraries is run on one lane using paired 151bp runs.

485 *Whole Exome Sequencing (WES)*

486 Express WES for saliva and tissue [dates: 8/13/2017 - 4/15/2018]:

487 1. Library Construction

488 Library construction was performed as described in Fisher et al., with the following  
489 modifications DNA input into shearing was reduced from 3 $\mu$ g to 10-100ng in 50 $\mu$ L of solution<sup>11</sup>.  
490 For adapter ligation, Illumina paired end adapters were replaced with palindromic forked  
491 adapters, purchased from Integrated DNA Technologies, with unique dual-indexed molecular  
492 barcode sequences to facilitate downstream pooling. Kapa HyperPrep reagents in 96-reaction kit  
493 format were used for end repair/A-tailing, adapter ligation, and library enrichment PCR. In  
494 addition, during the post-enrichment SPRI cleanup, elution volume was reduced to 30 $\mu$ L to  
495 maximize library concentration, and a vortexing step was added to maximize the amount of  
496 template eluted.

497 2. In-solution hybrid selection

498 After library construction, hybridization and capture were performed using the relevant  
499 components of Illumina's TruSeq Rapid Exome Kit and following the manufacturer's suggested  
500 protocol, with the following exceptions: first, all libraries within a library construction plate were  
501 pooled prior to hybridization. Second, the Midi plate from Illumina's TruSeq Rapid Exome Kit  
502 was replaced with a skirted PCR plate to facilitate automation. All hybridization and capture  
503 steps were automated on the Agilent Bravo liquid handling system.

504 3. Preparation of libraries for cluster amplification and sequencing

505 After post-capture enrichment, library pools were quantified using qPCR (automated  
506 assay on the Agilent Bravo), using a kit purchased from KAPA Biosystems with probes specific  
507 to the ends of the adapters. Based on qPCR quantification, libraries were normalized to 2nM,

508 then denatured using 0.1 N NaOH on the Hamilton Starlet. After denaturation, libraries were  
509 diluted to 20pM using hybridization buffer purchased from Illumina.

#### 510 4. Cluster amplification and sequencing

511 Cluster amplification of denatured templates was performed according to the  
512 manufacturer's protocol (Illumina) using HiSeq 4000 cluster chemistry and HiSeq 4000  
513 flowcells. Flowcells were sequenced on v1 Sequencing-by-Synthesis chemistry for HiSeq 4000  
514 flowcells. The flowcells are then analyzed using RTA v.1.18.64 or later. Each pool of whole  
515 exome libraries was run on paired 76bp runs, reading the dual-indexed sequences to identify  
516 molecular indices and sequenced across the number of lanes needed to meet coverage for all  
517 libraries in the pool.

518 Express WES for saliva and tissue [dates: 4/15/2018-6/1/2020]:

#### 519 1. Library Construction

520 Library construction was performed as described in Fisher et al., with the following  
521 modifications: initial genomic DNA input into shearing was reduced from 3µg to 10-100ng in  
522 50µL of solution. For adapter ligation, Illumina paired end adapters were replaced with  
523 palindromic forked adapters, purchased from Integrated DNA Technologies, with unique dual-  
524 indexed molecular barcode sequences to facilitate downstream pooling. Kapa HyperPrep  
525 reagents in 96-reaction kit format were used for end repair/A-tailing, adapter ligation, and library  
526 enrichment PCR. In addition, during the post-enrichment SPRI cleanup, elution volume was  
527 reduced to 30µL to maximize library concentration, and a vortexing step was added to maximize  
528 the amount of template eluted.

#### 529 2. In-solution hybrid selection

530 After library construction, hybridization and capture were performed using the relevant  
531 components of Illumina's TruSeq Rapid Exome Kit and following the manufacturer's suggested  
532 protocol, with the following exceptions: first, all libraries within a library construction plate were  
533 pooled prior to hybridization. Second, the Midi plate from Illumina's TruSeq Rapid Exome Kit  
534 was replaced with a skirted PCR plate to facilitate automation. All hybridization and capture  
535 steps were automated on the Agilent Bravo liquid handling system.

### 536 3. Preparation of libraries for cluster amplification and sequencing

537 After post-capture enrichment, library pools were quantified using qPCR (automated  
538 assay on the Agilent Bravo), using a kit purchased from KAPA Biosystems with probes specific  
539 to the ends of the adapters. Based on qPCR quantification, libraries were normalized to 2nM,  
540 then denatured using 0.2 N NaOH on the Hamilton Starlet. After denaturation, libraries were  
541 diluted to 20pM using hybridization buffer purchased from Illumina.

### 542 4. Cluster amplification and sequencing

543 Cluster amplification of denatured templates was performed according to the  
544 manufacturer's protocol (Illumina) using exclusion amplification cluster chemistry and HiSeq X  
545 flowcells. Flowcells were sequenced on v2.5 Sequencing-by-Synthesis chemistry for HiSeq X  
546 flowcells. The flowcells are then analyzed using RTA v.2.7.0 or later. Each pool of whole exome  
547 libraries was run on paired 76bp runs, reading the dual-indexed sequences to identify molecular  
548 indices and sequenced across the number of lanes needed to meet coverage for all libraries in the  
549 pool.

550

551 Deep ICE Exome from Non-UMI Enabled ULP Libraries Methods [dates: previous to  
552 8/13/2017]:

### 553 1. Library Construction

554 Initial DNA input is normalized to be within the range of 25-52.5 ng in 50 uL of TE  
555 buffer (10mM Tris HCl 1mM EDTA, pH 8.0) according to picogreen quantification. For adapter  
556 ligation, Illumina paired end adapters were replaced with palindromic forked adapters, purchased  
557 from Integrated DNA Technologies, with unique dual-indexed molecular barcode sequences to  
558 facilitate downstream pooling. With the exception of the palindromic forked adapters, the  
559 reagents used for end repair, A-base addition, adapter ligation, and library enrichment PCR were  
560 purchased from KAPA Biosciences in 96-reaction kits. In addition, during the post-enrichment  
561 SPRI cleanup, elution volume was reduced to 30µL to maximize library concentration, and a  
562 vortexing step was added to maximize the amount of template eluted.

### 563 2. In-solution hybrid selection

564 After library construction, hybridization and capture were performed using the relevant  
565 components of Illumina's Nextera Rapid Capture Exome Kit and following the manufacturer's  
566 suggested protocol, with the following exceptions: first, all libraries within a library construction  
567 plate were pooled prior to hybridization. Second, the Midi plate from Illumina's Nextera Rapid  
568 Capture Exome Kit was replaced with a skirted PCR plate to facilitate automation. All  
569 hybridization and capture steps were automated on the Agilent Bravo liquid handling system.

### 570 3. Preparation of libraries for cluster amplification and sequencing

571 After post-capture enrichment, library pools are quantified using qPCR (automated assay  
572 on the Agilent Bravo), using a kit purchased from KAPA Biosystems with probes specific to the



573 ends of the adapters. Based on qPCR quantification, pools are normalized using a Hamilton  
574 Starlet to 2nM and sequenced using Illumina sequencing technology.

#### 575 4. Cluster amplification and sequencing

576 Cluster amplification of library pools was performed according to the manufacturer's  
577 protocol (Illumina) using Exclusion Amplification cluster chemistry and HiSeq X flowcells.  
578 Flowcells were sequenced on v2 Sequencing-by-Synthesis chemistry for HiSeq X flowcells. The  
579 flowcells are then analyzed using RTA v.2.7.3 or later. Each pool of libraries was run on paired  
580 151bp runs, reading the dual-indexed sequences to identify molecular indices and sequenced  
581 across the number of lanes needed to meet coverage for all libraries in the pool.

582 Deep ICE Exome from UMI-Enabled ULP Libraries [dates: 8/13/2017-6/1/2020]:

##### 583 1. Library Construction

584 Initial DNA input is normalized to be within the range of 25-52.5 ng in 50 uL of TE  
585 buffer (10mM Tris HCl 1mM EDTA, pH 8.0) according to picogreen quantification. Library  
586 preparation is performed using a commercially available kit provided by KAPA Biosystems  
587 (KAPA HyperPrep Kit with Library Amplification product KK8504) and IDT's duplex UMI  
588 adapters. Unique 8-base dual index sequences embedded within the p5 and p7 primers  
589 (purchased from IDT) are added during PCR. Enzymatic clean-ups are performed using  
590 Beckman Coulter AMPure XP beads with elution volumes reduced to 30µL to maximize library  
591 concentration.

##### 592 2. Post Library Construction Quantification and Normalization

593 Library quantification was performed using the Invitrogen Quant-It broad range dsDNA  
594 quantification assay kit (Thermo Scientific Catalog: Q33130) with a 1:200 PicoGreen dilution.

595 Following quantification, each library is normalized to a concentration of 25 ng/μL, using Tris-  
596 HCl, 10mM, pH 8.0.

### 597 3. In-solution hybrid selection

598 After library construction, hybridization and capture were performed using the relevant  
599 components of Illumina's TruSeq Rapid Exome Kit and following the manufacturer's suggested  
600 protocol, with the following exceptions: first, all libraries within a library construction plate were  
601 pooled prior to hybridization. Second, the Midi plate from Illumina's TruSeq Rapid Exome Kit  
602 was replaced with a skirted PCR plate to facilitate automation. All hybridization and capture  
603 steps were automated on the Agilent Bravo liquid handling system.

### 604 4. Preparation of libraries for cluster amplification and sequencing

605 After post-capture enrichment, library pools are quantified using qPCR (automated assay  
606 on the Agilent Bravo), using a kit purchased from KAPA Biosystems with probes specific to the  
607 ends of the adapters. Based on qPCR quantification, pools are normalized using a Hamilton  
608 Starlet to 2nM and sequenced using Illumina sequencing technology.

### 609 5. Cluster amplification and sequencing

610 Cluster amplification of library pools was performed according to the manufacturer's  
611 protocol (Illumina) using Exclusion Amplification cluster chemistry and HiSeq X flowcells.  
612 Flowcells were sequenced on v2 Sequencing-by-Synthesis chemistry for HiSeq X flowcells. The  
613 flowcells are then analyzed using RTA v.2.7.3 or later. Each pool of libraries was run on paired  
614 151bp runs, reading the dual-indexed sequences to identify molecular indices and sequenced  
615 across the number of lanes needed to meet coverage for all libraries in the pool.

616

## SUPPLEMENTAL REFERENCES

- 617 1. Sztupinszki, Z., Diossy, M., Krzystanek, M., Reiniger, L., Csabai, I., Favero, F., Birkbak, N.J.,  
618 Eklund, A.C., Syed, A., and Szallasi, Z. (2018). Migrating the SNP array-based homologous  
619 recombination deficiency measures to next generation sequencing data of breast cancer. *Npj*  
620 *Breast Cancer* 4, 16, 10.1038/s41523-018-0066-6.
- 621 2. Adalsteinsson, V.A., Ha, G., Freeman, S.S., Choudhury, A.D., Stover, D.G., Parsons, H.A.,  
622 Gydush, G., Reed, S.C., Rotem, D., Rhoades, J., et al. (2017). Scalable whole-exome  
623 sequencing of cell-free DNA reveals high concordance with metastatic tumors. *Nat. Commun.*  
624 8, 1324, 10.1038/s41467-017-00965-y.
- 625 3. Mateo, J., Carreira, S., Sandhu, S., Miranda, S., Mossop, H., Perez-Lopez, R., Nava  
626 Rodrigues, D., Robinson, D., Omlin, A., Tunariu, N., et al. (2015). DNA-Repair Defects and  
627 Olaparib in Metastatic Prostate Cancer. *N. Engl. J. Med.* 373, 1697–1708,  
628 10.1056/NEJMoa1506859.
- 629 4. de Bono, J., Mateo, J., Fizazi, K., Saad, F., Shore, N., Sandhu, S., Chi, K.N., Sartor, O.,  
630 Agarwal, N., Olmos, D., et al. (2020). Olaparib for Metastatic Castration-Resistant Prostate  
631 Cancer. *N. Engl. J. Med.* 382, 2091–2102, 10.1056/NEJMoa1911440.
- 632 5. Pritchard, C.C., Mateo, J., Walsh, M.F., De Sarkar, N., Abida, W., Beltran, H., Garofalo, A.,  
633 Gulati, R., Carreira, S., Eeles, R., et al. (2016). Inherited DNA-Repair Gene Mutations in Men  
634 with Metastatic Prostate Cancer. *N. Engl. J. Med.* 375, 443–453, 10.1056/NEJMoa1603144.
- 635 6. AlDubayan, S. (2019). Considerations of multigene test findings among men with prostate  
636 cancer - knowns and unknowns. *Can. J. Urol.* 26, 14–16.

- 637 7. Tate, J.G., Bamford, S., Jubb, H.C., Sondka, Z., Beare, D.M., Bindal, N., Boutselakis, H.,  
638 Cole, C.G., Creatore, C., Dawson, E., et al. (2019). COSMIC: the Catalogue Of Somatic  
639 Mutations In Cancer. *Nucleic Acids Res.* *47*, D941–D947, 10.1093/nar/gky1015.
- 640 8. Huang, K.-L., Mashl, R.J., Wu, Y., Ritter, D.I., Wang, J., Oh, C., Paczkowska, M., Reynolds,  
641 S., Wyczalkowski, M.A., Oak, N., et al. (2018). Pathogenic Germline Variants in 10,389  
642 Adult Cancers. *Cell* *173*, 355-370.e14, 10.1016/j.cell.2018.03.039.
- 643 9. Rahman, N. (2014). Realizing the promise of cancer predisposition genes. *Nature* *505*, 302–  
644 308, 10.1038/nature12981.
- 645 10. Painter, C.A., Jain, E., Tomson, B.N., Dunphy, M., Stoddard, R.E., Thomas, B.S.,  
646 Damon, A.L., Shah, S., Kim, D., Gómez Tejeda Zañudo, J., et al. (2020). The Angiosarcoma  
647 Project: enabling genomic and clinical discoveries in a rare cancer through patient-partnered  
648 research. *Nat. Med.* *26*, 181–187, 10.1038/s41591-019-0749-z.
- 649 11. Fisher, S., Barry, A., Abreu, J., Minie, B., Nolan, J., Delorey, T.M., Young, G., Fennell,  
650 T.J., Allen, A., Ambrogio, L., et al. (2011). A scalable, fully automated process for  
651 construction of sequence-ready human exome targeted capture libraries. *Genome Biol.* *12*, R1,  
652 10.1186/gb-2011-12-1-r1.

653
